# Supplementary material for: Machine learning prediction of hydrogen atom transfer reactivity in photoredox-mediated C–H functionalization
Source: Royal Society of Chemistry journal article supplement (doi:10.1039/d1qo01325d), 2021-01-01
Supplement: d1qo01325d2.pdf [file d1qo01325d2.pdf]

## Supporting Information

# Machine Learning Prediction of Hydrogen Atom Transfer Reactivity in Photoredox-Mediated C–H Functionalization

Li-Cheng Yang, Xin Li, Shuo-Qing Zhang, and Xin Hong\*

Center of Chemistry for Frontier Technologies, Department of Chemistry, State Key Laboratory of Clean  
Energy Utilization, Zhejiang University  
38 Zheda Road, Hangzhou, 310027 (China)  
Email: hxchem@zju.edu.cn

**Abstract:** Photoredox-mediated hydrogen atom transfer (HAT) catalysis has reshaped the synthetic strategy of C–H bond functionalization. The rationalization and prediction of HAT reactivity are critical for the reaction design of photoredox-mediated C–H functionalization. In this work, we report the development of a machine learning model that can predict the HAT barrier of photoredox-mediated HAT catalysis using the physical organic descriptors of the ground state substrate and radical. Based on 2926 DFT-computed HAT barriers of the designed chemical space, the trained AdaBoost model is able to predict the HAT barrier with a mean absolute error of 0.60 kcal/mol in the out-of-sample test set. The applicability of the machine learning model is further validated by comparing the prediction against the DFT-computed reactivities on scaffolds and substituents that are not present in the designed chemical space, as well as experimental kinetics data of HAT reaction with cumyloxyl radical. This work provides a machine learning approach for reactivity prediction from physical organic descriptors and DFT-computed statistics, offering a useful tool that can be directly applied in the experimental designs of photoredox-mediated HAT catalysis.

**DOI:**

## Table of Contents

- Section S1. DFT computational details
  - S1.1. Solvation energy calculation
  - S1.2. Computational data generation
- Section S2. Details and calculations of PhysOrg features
  - S2.1. Bond dissociation energy (BDE)
  - S2.2. Frontier orbital energy
  - S2.3. Atomic charge
  - S2.4. Bond order
  - S2.5. Buried volume
- Section S3. Details of tested machine learning (ML) models
- Section S4. Details of machine learning (ML)
  - S4.1. Regression performance metrics
  - S4.2. Data preprocessing and model generation
  - S4.3. 5-fold cross validation performances with varying model complexities
  - S4.4. Learning curve
  - S4.5. Features of established machine learning model
  - S4.6. Labels in training set
- Section S5. Detailed information in testing the conformational dependence of the PhysOrg-AdaBoost model
- Section S6. Detailed performances of the PhysOrg-AdaBoost model in the test set of C–H functionalization substrates that were not present in the designed chemical space
- Section S7. Detailed performances of the PhysOrg-AdaBoost model in test set of HAT reactions that have experimental kinetics data
- Section S8. Detailed performances of the PhysOrg-AdaBoost model on selectivity prediction
- Section S9. Dataset and cartesian coordinates of structures
- Section S10. Performances of the PhysOrg-AdaBoost model using dataset splitting
- Section S11. Availability of the developed ML model for HAT reactivity prediction
- References

## Section S1. DFT computational details

All DFT calculations were performed with Gaussian 09 software package.<sup>1</sup> Geometry optimization of all minima and transition states (TS) were carried out at the B3LYP<sup>2,3</sup> level of theory with the 6-31+G(d,p) basis set. Vibrational frequencies were computed at the same level to evaluate its zero-point vibrational energy (ZPVE) and thermal corrections at 298 K and to check whether each optimized structure is an energy minimum or a transition state. The single-point energies were computed at the M06-2X<sup>4</sup> level of theory with the def2-TZVPP<sup>5,6</sup> basis set, using the gas-phase optimized structures. Solvation energies corrections were evaluated by a self-consistent reaction field (SCRF) using the SMD model<sup>7</sup> with M06-2X functional and 6-31G(d) basis set, based on the gas-phase optimized structures. Conformational searches for the intermediates and transition states have been conducted to ensure that the lowest energy conformers were located (Section S1.2). The 3D diagrams of molecules were generated using CYLview.<sup>8</sup>

### S1.1. Solvation energy calculation

The acetonitrile solvent, DMSO solvent, and acetone solvent were chosen for the calculation of solvation energy due to its wide applications in the photoredox-mediated HAT catalysis. The computed barriers in acetonitrile were compared with those in acetone and DMSO for a representative set of HAT reactions. The details of the selected 56 reactions are elaborated in Figure S1a. Satisfying linear correlations were identified between the results in the three solvents (Figure S1b). Therefore, we believe the DFT-computed barriers and the derived machine learning model are also applicable for DMSO, acetone and other polar solvents. The computations of HAT barriers in solution were performed with the gas-phase optimized geometries and subsequent single-point energy calculations in solution.

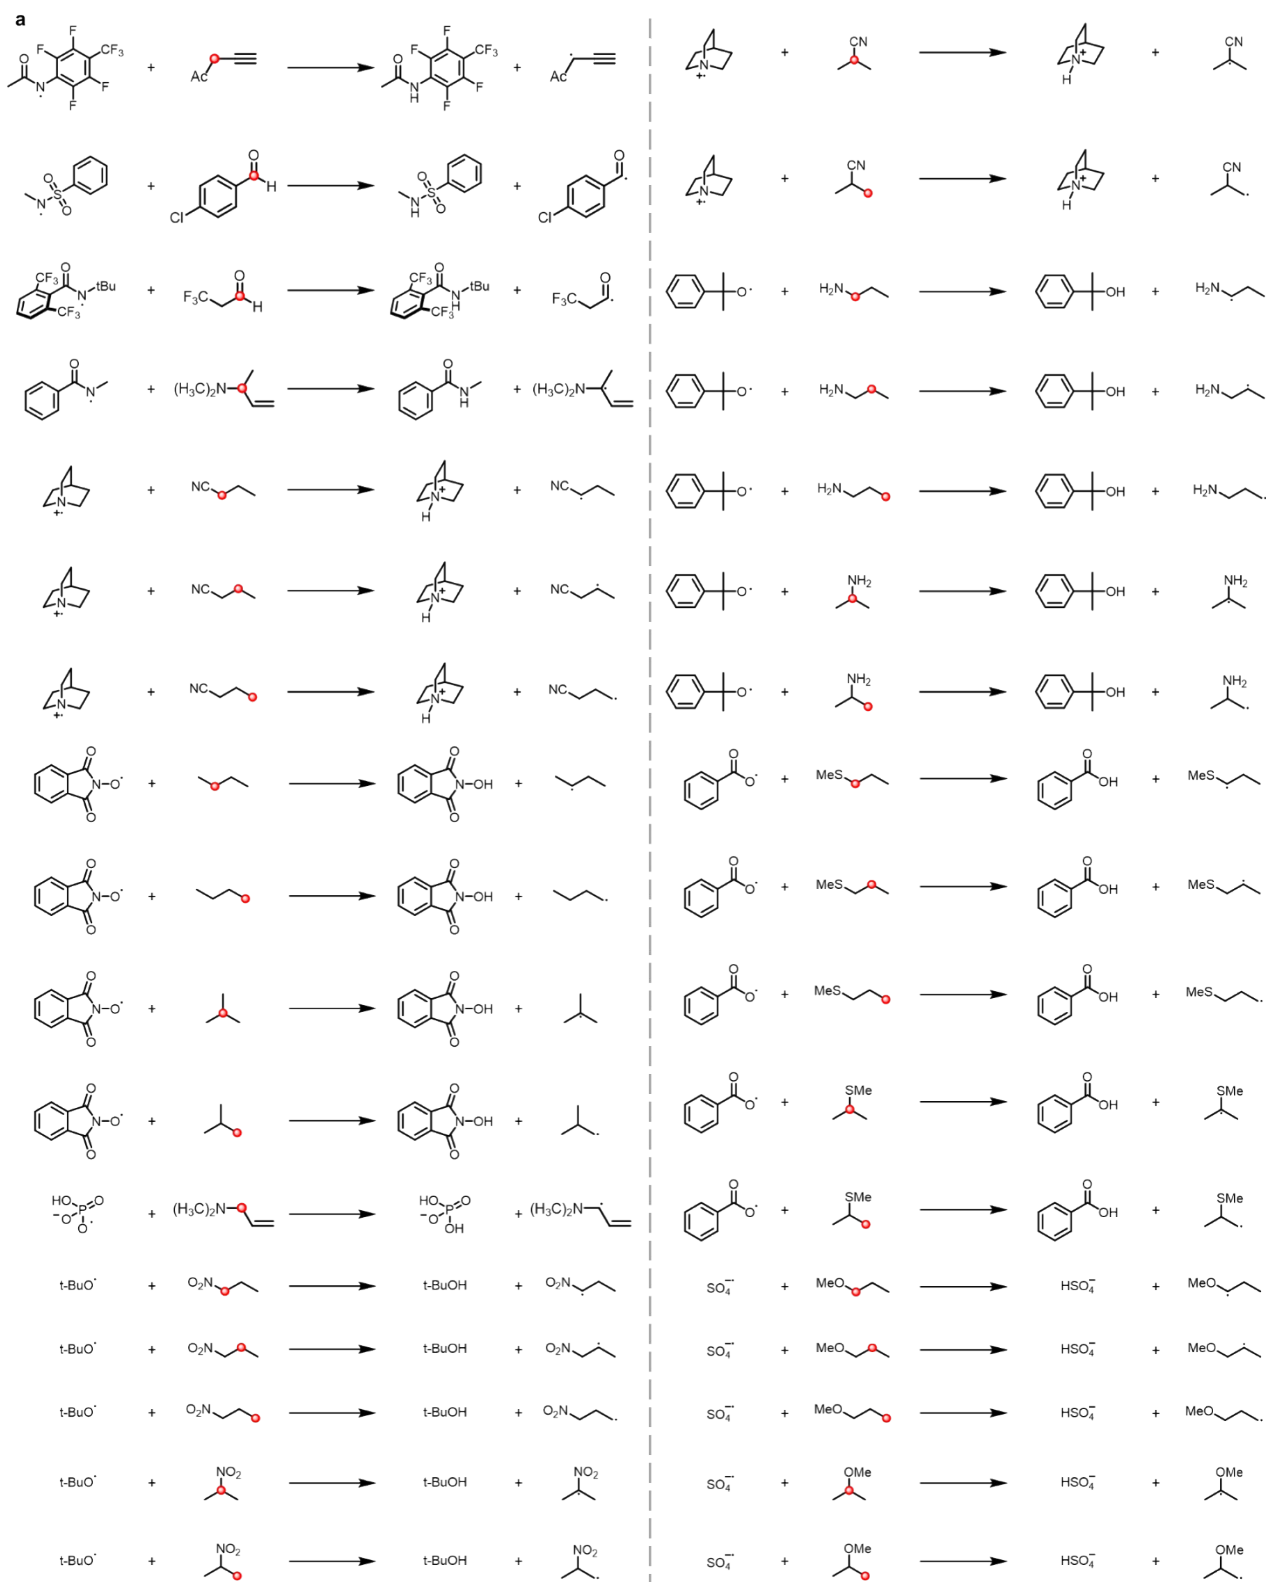

**Figure S1.** Comparisons of the DFT-computed HAT barriers in acetonitrile with those in DMSO and acetone for a selected set of representative reactions. (a) Testing reactions. The reacting C-H positions are labelled in red. (b) Correlation between DFT-computed HAT barriers in different solvents.

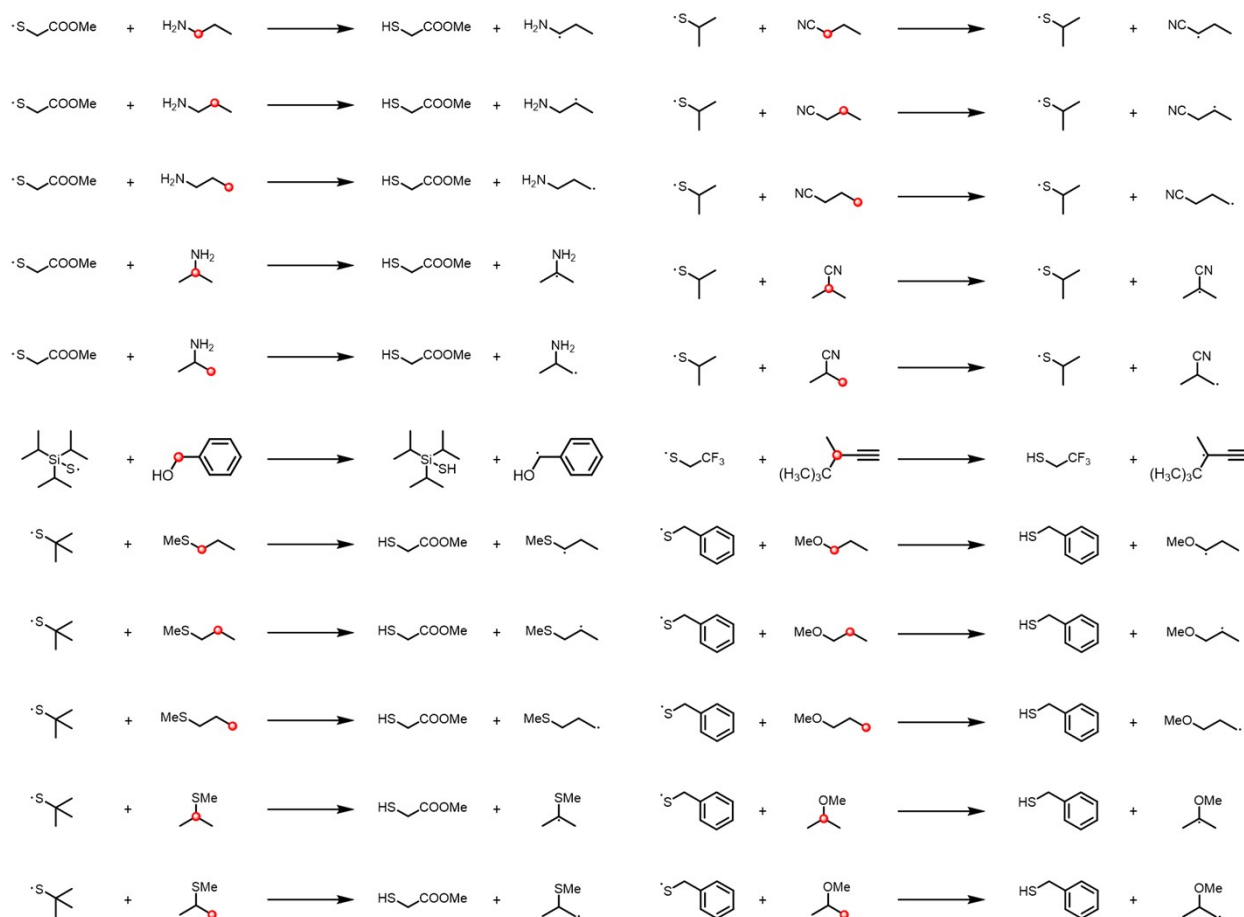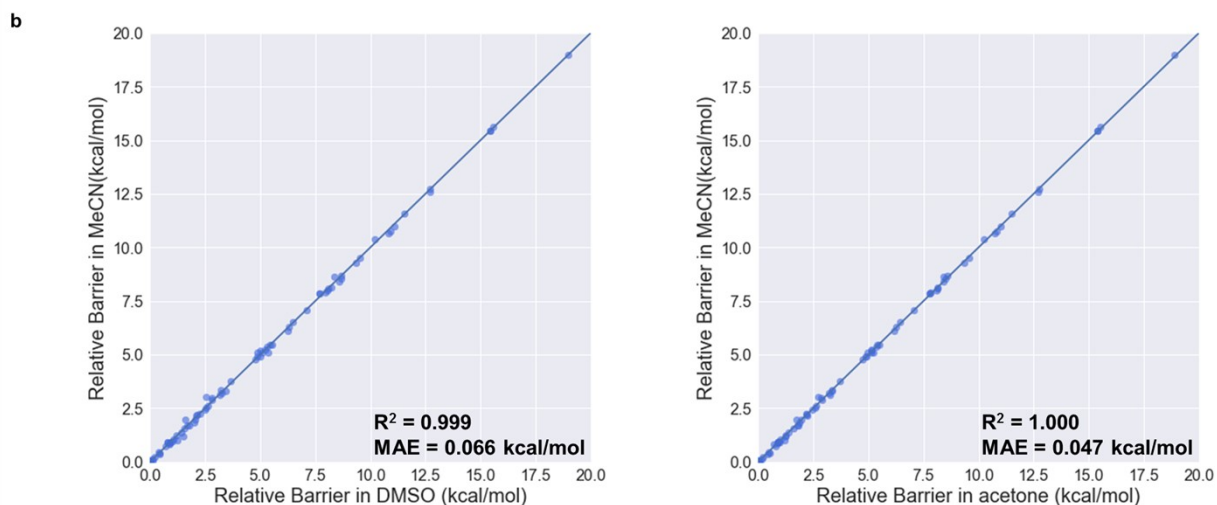

**Figure S1.** (continued) Comparisons of the DFT-computed HAT barriers in acetonitrile with those in DMSO and acetone for a selected set of representative reactions. (a) Testing reactions. The reacting C–H positions are labeled in red. (b) Correlation between DFT-computed HAT barriers in different solvents.

## S1.2. Computational data generation

The flow chart of the DFT-computed data generation is elaborated in Figure S2. The substrates and radicals were optimized individually first, which led to the optimized structures and DFT-computed energies of the reactants. Through conformational search of the individual substrates and radicals, the most stable conformer was identified and used in the construction of initial guess in the transition state calculations. For each target transition state, combining the corresponding fragments of substrate and radical generated the initial guess. In addition to the generated geometry of the initial guess, several rotamers around the C–H–radical axial were also considered. These generated guess geometries for the transition state were subjected to the optimization of transition state. Each output file of the TS optimization was checked manually to ensure that correct HAT transition state was

located. For the error output files of the TS optimization, manual adjustment of the TS guess was performed to see if further optimization is successful. Subsequent single-point energy calculation was performed on all the optimized transition state structures. The most favorable conformer of the transition state was accounted for the DFT-computed HAT barrier.

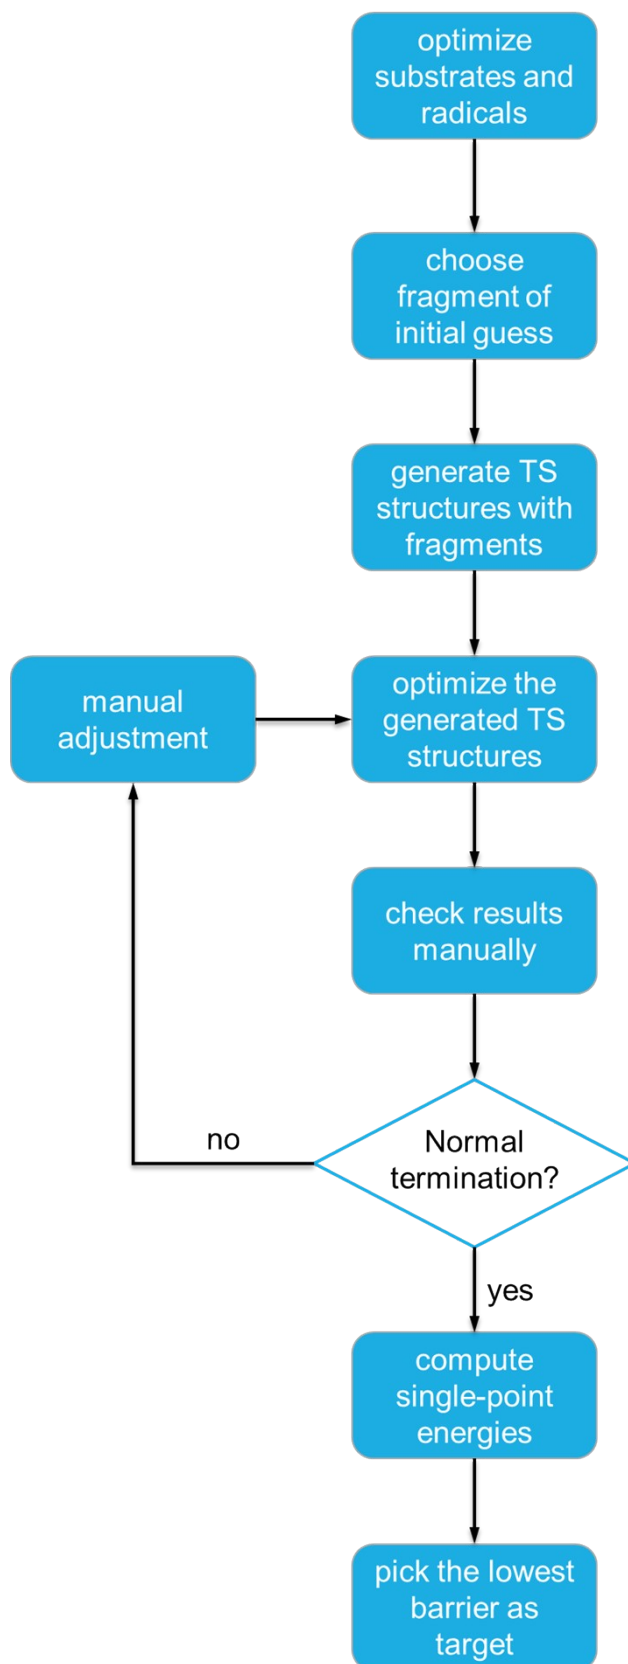

**Figure S2.** Flow chart of the DFT-computed data generation.

## Section S2. Details and calculations of PhysOrg descriptors

For PhysOrg descriptors, we selected 56 descriptors in five categories of bond dissociation energy (BDE), frontier orbital energy, atomic charge, bond order and steric effect. These features describe the site-specific local properties (BDE, atomic charge, bond order and steric effect) as well as the global properties (frontier orbital energy). The details and the generation procedure of the descriptors are elaborated in this section.

All the descriptors, except for steric effect, were obtained through DFT calculations under the M06-2X/def2-TZVPP level of theory. Based on the gas phase-optimized geometry, nature bond orbital (NBO)<sup>9</sup> calculations were performed to obtain the atomic charge and Wiberg bond order<sup>10-12</sup> information.

### S2.1. Bond dissociation energy (BDE)

The difference between of the cleaving/forming X–H bonds of the substrates and radicals,  $\Delta$ BDE, were used in model training. The BDE difference,  $\Delta$ BDE, was calculated as:

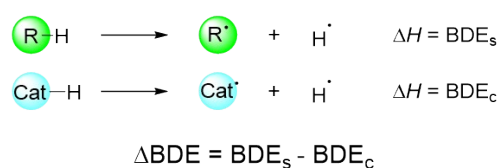

### S2.2. Frontier orbital energy

**Table S1** includes the definition and calculation details of the FMO energy-based descriptors.<sup>13</sup> Among HAT reactants and products, the HOMO and LUMO energies for singlet molecules and the SOMO energy for doublet molecules were obtained from single-point energy calculation. The HOMO and LUMO energies lead to a series of derived descriptors (chemical potential,<sup>13,16</sup> chemical hardness,<sup>13,17-19</sup> chemical softness<sup>17,20,21</sup> and electrophilicity<sup>22</sup>), and the calculation formulas are included in Table S1. The ionization energy (IE) was computed by comparing the energy of the neutral radical and that of the corresponding cation with the same geometry.<sup>23,24</sup> The electron affinity (EA) was computed by comparing the energy of the neutral radical and that of the corresponding anion with the same geometry. IE and EA lead to the electronegativity and chemical softness of radical (Table S1).

**Table S1.** Symbol, definition and calculation formula of FMO energy-based descriptors.

| Molecule  | Feature | Definition                                                                  | Calculation Formula                             |
|-----------|---------|-----------------------------------------------------------------------------|-------------------------------------------------|
| substrate | E01     | HOMO energy of substrate of reactant                                        | $E_{srHOMO}$                                    |
| substrate | E02     | LUMO energy of substrate of reactant                                        | $E_{srLUMO}$                                    |
| substrate | E03     | Chemical potential (negative of electronegativity) of substrate of reactant | $\mu_{sr} = \frac{E_{srHOMO} + E_{srLUMO}}{2}$  |
| substrate | E04     | Chemical hardness of substrate of reactant                                  | $\eta_{sr} = \frac{E_{srLUMO} - E_{srHOMO}}{2}$ |
| substrate | E05     | Chemical softness of substrate of reactant                                  | $\sigma_{sr} = \frac{1}{\eta_{sr}}$             |
| substrate | E06     | Electrophilicity of substrate of reactant                                   | $\omega_{sr} = \frac{\mu_{sr}^2}{2\eta_{sr}}$   |
| substrate | E07     | SOMO energy of substrate of product                                         | $E_{spSOMO}$                                    |

|           |     |                                                                           |                                                       |
|-----------|-----|---------------------------------------------------------------------------|-------------------------------------------------------|
| substrate | E08 | Ionization energy of substrate of product                                 | $IE_{sp} = E_{spR^+} - E_{spR}$                       |
| substrate | E09 | Electron affinity of substrate of product                                 | $EA_{sp} = E_{spR} - E_{spR^-}$                       |
| substrate | E10 | Electronegativity of substrate of product                                 | $\chi_{sp} = -\mu_{sp} = \frac{IE_{sp} + EA_{sp}}{2}$ |
| substrate | E11 | Chemical softness of substrate of product                                 | $\sigma_{sp} = \frac{1}{IE_{sp} - EA_{sp}}$           |
| catalyst  | E12 | SOMO energy of catalyst of reactant                                       | $E_{crSOMO}$                                          |
| catalyst  | E13 | Ionization energy of catalyst of reactant                                 | $IE_{cr} = E_{crR^+} - E_{crR}$                       |
| catalyst  | E14 | Electron affinity of catalyst of reactant                                 | $EA_{cr} = E_{crR} - E_{crR^-}$                       |
| catalyst  | E15 | Electronegativity of catalyst of reactant                                 | $\chi_{cr} = -\mu_{cr} = \frac{IE_{cr} + EA_{cr}}{2}$ |
| catalyst  | E16 | Chemical softness of catalyst of reactant                                 | $\sigma_{cr} = \frac{1}{IE_{cr} - EA_{cr}}$           |
| catalyst  | E17 | HOMO energy of catalyst of product                                        | $E_{cpHOMO}$                                          |
| catalyst  | E18 | LUMO energy of catalyst of product                                        | $E_{cpLUMO}$                                          |
| catalyst  | E19 | Chemical potential (negative of electronegativity) of catalyst of product | $\mu_{cp} = \frac{E_{cpHOMO} + E_{cpLUMO}}{2}$        |
| catalyst  | E20 | Chemical hardness of catalyst of product                                  | $\eta_{cp} = \frac{E_{cpLUMO} - E_{cpHOMO}}{2}$       |
| catalyst  | E21 | Chemical softness of catalyst of product                                  | $\sigma_{cp} = \frac{1}{\eta_{cp}}$                   |
| catalyst  | E22 | Electrophilicity of catalyst of product                                   | $\omega_{cp} = \frac{\mu_{cp}^2}{2\eta_{cp}}$         |

### S2.3. Atomic charge

Table S2 includes the definition and calculation details of the atomic charge-based descriptors. In addition to the atomic charges computed with NBO calculation, the condensed-to-atom Fukui functions of reacting carbon atom ( $f_C^+$ ,  $f_C^0$  and  $f_C^-$ )<sup>14,25,26</sup> were also calculated. Once the condensed-to-atom Fukui function was evaluated, the condensed dual descriptor ( $\Delta f_C$ )<sup>10,27</sup>

When  $Q_C$  is the electronic population of reacting carbon atom in the molecule under consideration and  $N$  is the number of electrons, the  $f_C^+$  is calculated by comparing the atomic charge in the anionic state and neutral state, using the same geometry optimized in the neutral state by definition.<sup>15, 26</sup>

$$f_C^+ = Q_C^{N+1} - Q_C^N$$

The  $f_C^0$  is calculated by comparing the atomic charge in the anionic state and cationic state, using the same geometry optimized in the neutral state by definition.<sup>15, 26</sup>

$$f_C^0 = (Q_C^{N+1} - Q_C^{N-1})/2$$

The  $f_C^-$  is calculated by comparing the atomic charge in the neutral state and cationic state, using the same geometry optimized in the neutral state by definition.<sup>15, 26</sup>

$$f_C^- = Q_C^N - Q_C^{N-1}$$

The use of a dual descriptor defined in terms of the variation of hardness with respect to the external potential. The condensed dual descriptor of reacting carbon atom ( $\Delta f_C$ ) is written as the difference between  $f_C^+$  and  $f_C^-$ , can also be used as an alternative to rationalize the site reactivity<sup>15,27-28</sup>:

$$\Delta f_C = f_C^+ - f_C^-$$

**Table S2.** Symbol, definition and calculation formula of atomic charge-based descriptors.

| Molecule  | Feature | Definition                                                                  | Calculation Formula                            |
|-----------|---------|-----------------------------------------------------------------------------|------------------------------------------------|
| substrate | Q01     | Atomic charge of the reacting C atom of substrate of reactant               | $Q_{-sr}^N$                                    |
| substrate | Q02     | Fukui functions value $f^+$ of the reacting C atom of substrate of reactant | $Q_{-srf}_C^+ = Q_{-sr}^{N+1} - Q_{-sr}^N$     |
| substrate | Q03     | Fukui functions value $f^-$ of the reacting C atom of substrate of reactant | $Q_{-srf}_C^- = Q_{-sr}^N - Q_{-sr}^{N-1}$     |
| substrate | Q04     | Fukui functions value $Df$ of the reacting C atom of substrate of reactant  | $\Delta f_{-sr} = Q_{-srf}_C^+ - Q_{-srf}_C^-$ |
| substrate | Q05     | Atomic charge of the reacting C atom of substrate of product                | $Q_{-sp}^N$                                    |
| substrate | Q06     | Fukui functions value $f^0$ of the reacting C atom of substrate of product  | $Q_{-spf}_C^0 = Q_{-sp}^{N+1} - Q_{-sp}^{N-1}$ |
| catalyst  | Q07     | Atomic charge of the reacting atom of catalyst of reactant                  | $Q_{-cr}^N$                                    |
| catalyst  | Q08     | Fukui functions value $f^0$ of the reacting atom of catalyst of reactant    | $Q_{-crf}_C^0 = Q_{-cr}^{N+1} - Q_{-cr}^{N-1}$ |
| catalyst  | Q09     | Atomic charge of the reacting atom of catalyst of product                   | $Q_{-cp}^N$                                    |
| catalyst  | Q10     | Fukui functions value $f^+$ of the reacting atom of catalyst of product     | $Q_{-cpf}_C^+ = Q_{-cp}^{N+1} - Q_{-cp}^N$     |
| catalyst  | Q11     | Fukui functions value $f^-$ of the reacting atom of catalyst of product     | $Q_{-cpf}_C^- = Q_{-cp}^N - Q_{-cp}^{N-1}$     |
| catalyst  | Q12     | Fukui functions value $Df$ of the reacting atom of catalyst of product      | $\Delta f_{-cp} = Q_{-cpf}_C^+ - Q_{-cpf}_C^-$ |

## S2.4. Bond order

Raw data of bond order descriptors are obtained from Wiberg bond indexes.<sup>10-12</sup> Since the reaction is hydrogen atom transfer reaction, it is necessary to take C-H bond orders into consideration. For each substrate of reactant, the smallest C-H bond order of the reacting C atom is considered, while the average number of the bond order between H and the reacting atom, average number of the bond order without H are included for the reacting atom of catalyst of product. Besides, for both reactant and product of substrates, the biggest C-X bond order of the reacting C atom are picked. In addition, the average number of the bond order of the reacting C atom of each kind of molecules is regarded as important descriptor. (Table S3)

**Table S3.** Symbol, definition and calculation formula of bond order-based descriptors.

| Molecule  | Feature | Definition                                                                                     | Calculation Formula |
|-----------|---------|------------------------------------------------------------------------------------------------|---------------------|
| substrate | B01     | The biggest C-X bond order of the reacting C atom of substrate of reactant<br>(X can not be H) | $B_{C-X-SR}^{max}$  |
| substrate | B02     | The smallest C-H bond order of the reacting C atom of substrate of reactant                    | $B_{C-H-SR}^{min}$  |



|           |     |                                                                                               |                     |
|-----------|-----|-----------------------------------------------------------------------------------------------|---------------------|
| substrate | B03 | The average number of the bond order of the reacting C atom of substrate of reactant          | $B_{C}^{ave\_sr}$   |
| substrate | B04 | The average number of the bond order of the reacting C atom of substrate of product           | $B_{C}^{ave\_sp}$   |
| substrate | B05 | The biggest C-X bond order of the reacting C atom of substrate of product<br>(X can not be H) | $B_{C-X}^{max\_sp}$ |
| catalyst  | B06 | The average number of the bond order of the reacting atom of catalyst of reactant             | $B^{ave\_cr}$       |
| catalyst  | B07 | The average number of the bond order of the reacting atom of catalyst of product              | $B^{ave\_cp}$       |
| catalyst  | B08 | The average number of the bond order between H and the reacting atom of catalyst of product   | $B_{C-H}^{ave\_cp}$ |
| catalyst  | B09 | The average number of the bond order without H of the reacting atom of catalyst of product    | $B_{C-X}^{ave\_cp}$ |

## S2.5. Buried volume

Buried volume was calculated using a written Matlab script based on its original definition.<sup>29-32</sup> Our Matlab script is available at GitHub: <https://github.com/HFLSpopcorn/HAT-ReactivityPredictor>. The sphere radius of 3Å, 4Å, and 5Å were used to measure the steric effects of various distances. (Table S4)

**Table S4.** Symbol, definition and calculation formula of buried volume-based descriptors.

| Molecule  | Feature | Definition                                                                        | Calculation Formula          |
|-----------|---------|-----------------------------------------------------------------------------------|------------------------------|
| substrate | V01     | Buried volume of the reacting C atom of substrate of reactant, sphere radius = 3Å | $\%V_{Bur}^{3\text{\AA}}-sr$ |
| substrate | V02     | Buried volume of the reacting C atom of substrate of reactant, sphere radius = 4Å | $\%V_{Bur}^{4\text{\AA}}-sr$ |
| substrate | V03     | Buried volume of the reacting C atom of substrate of reactant, sphere radius = 5Å | $\%V_{Bur}^{5\text{\AA}}-sr$ |
| substrate | V04     | Buried volume of the reacting C atom of substrate of product, sphere radius = 3Å  | $\%V_{Bur}^{3\text{\AA}}-sp$ |
| substrate | V05     | Buried volume of the reacting C atom of substrate of product, sphere radius = 4Å  | $\%V_{Bur}^{4\text{\AA}}-sp$ |
| substrate | V06     | Buried volume of the reacting C atom of substrate of product, sphere radius = 5Å  | $\%V_{Bur}^{5\text{\AA}}-sp$ |
| catalyst  | V07     | Buried volume of the reacting atom of catalyst of reactant, sphere radius = 3Å    | $\%V_{Bur}^{3\text{\AA}}-cr$ |
| catalyst  | V08     | Buried volume of the reacting atom of catalyst of reactant, sphere radius = 4Å    | $\%V_{Bur}^{4\text{\AA}}-cr$ |
| catalyst  | V09     | Buried volume of the reacting atom of catalyst of reactant, sphere radius = 5Å    | $\%V_{Bur}^{5\text{\AA}}-cr$ |
| catalyst  | V10     | Buried volume of the reacting atom of catalyst of product, sphere radius = 3Å     | $\%V_{Bur}^{3\text{\AA}}-cp$ |
| catalyst  | V11     | Buried volume of the reacting atom of catalyst of product, sphere radius = 4Å     | $\%V_{Bur}^{4\text{\AA}}-cp$ |
| catalyst  | V12     | Buried volume of the reacting atom of catalyst of product, sphere radius = 5Å     | $\%V_{Bur}^{5\text{\AA}}-cp$ |

### Section S3. Details of tested machine learning (ML) models

Model selection plays a crucial role in training machine learning models. We used 5-fold cross-validation to test the performance of candidate machine learning algorithms, and MAE, MSE and  $R^2$  to examine the regression performance of these models. In  $k$ -fold cross validation, the dataset was randomly split to  $k$  parts. For each model training and evaluation,  $k-1$  parts were used for model training, and the rest one part was used for validation. In  $k$  times of error evaluations, the mean score of the  $k$  validation results is the final validation result for  $k$ -fold cross validation. The candidate algorithms include 17 regression models commonly used in Scikit-learn package,<sup>33</sup> which include Logistic Regression (LR), Naïve Bayes, Decision Tree, k-Nearest Neighbor (KNN), Support Vector Machine (SVM), Random Forest (RF), Extra Trees, extreme Gradient Boosting (XGB), AdaBoost and Neural Network (NN). Based on the default hyperparameter settings, with certain modifications of hyperparameters, the details are shown as Table S5~10.

**Table S5.** 5-fold cross validation performance and hyperparameters of tested machine learning (ML) models (MSE is in kcal<sup>2</sup>/mol<sup>2</sup> and MAE is in kcal/mol).

| Learner name | Sclearn regressor names   | $R^2$ | MSE  | MAE  | Main hyperparameters                                                                                       |
|--------------|---------------------------|-------|------|------|------------------------------------------------------------------------------------------------------------|
| AdaBoost     | AdaBoostRegressor         | 0.971 | 0.73 | 0.61 | base_estimator=ExtraTreesRegressor(n_estimators=30, criterion='mse', min_samples_split=5), n_estimators=50 |
| NN           | MLPRegressor              | 0.971 | 0.73 | 0.61 | hidden_layer_sizes=(100, 100, ), activation='relu'                                                         |
| XGB          | XGBRegressor              | 0.971 | 0.73 | 0.61 | max_depth=5, n_estimators=150                                                                              |
| ExtraTrees   | ExtraTreesRegressor       | 0.970 | 0.76 | 0.62 | n_estimators=150, criterion='mse', min_samples_split=5                                                     |
| RF           | RandomForestRegressor     | 0.961 | 0.98 | 0.70 | n_estimators=150, criterion='mse', min_samples_split=5                                                     |
| GB           | GradientBoostingRegressor | 0.959 | 1.03 | 0.74 | loss='ls', n_estimators=100                                                                                |
| SVR          | SVR                       | 0.933 | 1.68 | 0.89 | kernel='rbf', degree=3                                                                                     |
| DTree        | DecisionTreeRegressor     | 0.921 | 1.98 | 0.99 | criterion='mse', min_samples_split=2                                                                       |
| K-Neighbors  | KNeighborsRegressor       | 0.901 | 2.48 | 1.18 | n_neighbors=5, weights='uniform', leaf_size=30                                                             |
| LR           | LinearRegression          | 0.878 | 3.07 | 1.33 | --                                                                                                         |
| Ridge        | Ridge                     | 0.878 | 3.07 | 1.34 | alpha=0.5                                                                                                  |
| BR           | BayesianRidge             | 0.877 | 3.10 | 1.34 | --                                                                                                         |
| LSVR         | LinearSVR                 | 0.874 | 3.18 | 1.33 | --                                                                                                         |
| SGD          | SGDRegressor              | 0.871 | 3.22 | 1.38 | loss='squared_loss'                                                                                        |

|              |                          |       |        |       |                           |
|--------------|--------------------------|-------|--------|-------|---------------------------|
| Lasso        | Lasso                    | 0.645 | 8.92   | 2.35  | alpha=1.0                 |
| GP           | GaussianProcessRegressor | 0.000 | 151.94 | 10.73 | optimizer='fmin_l_bfgs_b' |
| Kernel Ridge | KernelRidge              | 0.000 | 307.17 | 17.41 | alpha=1, kernel='linear'  |

**Table S6.** 5-fold cross validation performance of XGBoost model.

| estimators     | 50    | 100   | 150 ( <i>best</i> ) | 200   |
|----------------|-------|-------|---------------------|-------|
| MAE            | 0.630 | 0.646 | 0.610               | 0.615 |
| MSE            | 0.797 | 0.798 | 0.728               | 0.764 |
| R <sup>2</sup> | 0.968 | 0.968 | 0.971               | 0.970 |

**Table S7.** 5-fold cross validation performance of Neural Network model.

| layer          | 100,100 ( <i>best</i> ) | 50,100,50 | 64,64 | 128,128 |
|----------------|-------------------------|-----------|-------|---------|
| MAE            | 0.614                   | 0.660     | 0.631 | 0.623   |
| MSE            | 0.726                   | 0.821     | 0.762 | 0.747   |
| R <sup>2</sup> | 0.971                   | 0.967     | 0.970 | 0.970   |

**Table S8.** 5-fold cross validation performance of AdaBoost model with ExtraTrees as base model.

| estimators     | 10*200 | 20*30 | 20*50 | 20*70 | 30*30 | 30*50 ( <i>best</i> ) | 30*70 | 200*10 |
|----------------|--------|-------|-------|-------|-------|-----------------------|-------|--------|
| MAE            | 0.614  | 0.618 | 0.619 | 0.616 | 0.613 | 0.612                 | 0.618 | 0.617  |
| MSE            | 0.751  | 0.749 | 0.770 | 0.758 | 0.757 | 0.728                 | 0.749 | 0.770  |
| R <sup>2</sup> | 0.970  | 0.970 | 0.969 | 0.970 | 0.970 | 0.971                 | 0.970 | 0.969  |

**Table S9.** 5-fold cross validation performance of AdaBoost model with Decision Tree as base model.

| estimators     | 50    | 70    | 100   | 200 ( <i>best</i> ) |
|----------------|-------|-------|-------|---------------------|
| MAE            | 0.712 | 0.717 | 0.710 | 0.700               |
| MSE            | 0.977 | 1.014 | 0.982 | 0.978               |
| R <sup>2</sup> | 0.961 | 0.960 | 0.961 | 0.961               |

**Table S10.** 5-fold cross validation performance of AdaBoost model with Random Forest as base model.

| estimators     | 30*30 | 30*50 | 30*70 | 30*100 ( <i>best</i> ) |
|----------------|-------|-------|-------|------------------------|
| MAE            | 0.661 | 0.664 | 0.659 | 0.654                  |
| MSE            | 0.852 | 0.865 | 0.866 | 0.835                  |
| R <sup>2</sup> | 0.966 | 0.965 | 0.966 | 0.967                  |

## Section S4. Details of machine learning (ML)

The 2926 HAT barriers and corresponding descriptors were used to train the model. In order to establish a predictive model with the best performance, the performance of AdaBoost models with different base estimators were tested. The AdaBoost model performs best when ExtraTrees is used as the base estimator, and was further improved by feature selection. For hyperparameters, MSE is used as the loss function, and the numbers of estimators of ExtraTrees and AdaBoost are 30 and 50, respectively.

**Table S11.** Training and validation performances using AdaBoost model with ExtraTrees as base model.

| Performance | R <sup>2</sup> of | MAE of       | MSE of       | R <sup>2</sup> of | MAE of         | MSE of         |
|-------------|-------------------|--------------|--------------|-------------------|----------------|----------------|
|             | Training Set      | Training Set | Training Set | Validation Set    | Validation Set | Validation Set |
| Scores      | 0.999             | 0.101        | 0.013        | 0.971             | 0.612          | 0.728          |

#### S4.1. Regression performance metrics

Mean absolute error (MAE) represents the difference between the original and predicted values, extracted by averaging the absolute differences over the data set.

$$MAE = \frac{1}{m} \sum_{i=1}^m |y^i - \hat{y}^i|$$

Mean squared error (MSE) represents the difference between the original and predicted values, extracted by averaging the squared differences over the data set.

$$MSE = \frac{1}{m} \sum_{i=1}^m (y^i - \hat{y}^i)^2$$

Coefficient of determination (R<sup>2</sup>) represents how well the predicted values fit comparing with the true values. The value ranges from 0 to 1. The higher the value is, the better performance the model has.

$$R^2 = \frac{\sum_i (y - \hat{y})^2}{\sum_i (y - \bar{y})^2}$$

The adjusted R<sup>2</sup> compares the descriptive ability of regression models (two or more variables) that include a diverse number of independent variables, which corrects the influence of variable number.

The adjusted R<sup>2</sup> is defined as:

$$R_{adj}^2 = 1 - \frac{(R^2 - R^2_{min})}{n - p - 1}$$

Where  $n$  is the number of samples,  $p$  is the number of variables in the model.

As the definition of adjusted R<sup>2</sup> allows it to be negative, which means the model doesn't fit the data, we assigned the negative R<sup>2</sup> value as zero following literature precedent.<sup>34</sup>

In this work, we always used adjusted R<sup>2</sup> as the measure of R<sup>2</sup> in the main text and SI.

#### S4.2. Data preprocessing and model generation

All machine learning methods were implemented with Python3 scripts using Scikit-learn package. Prior to training, all descriptors were scaled by standard score method, which is calculated as

$$z = \frac{x - \mu}{\sigma}$$

where  $\mu$  is the mean of the population and  $\sigma$  is the standard deviation of the population. The descriptors and the target property (reaction barrier) were subjected to candidate machine learning algorithms to evaluate the performance and select the best machine learning algorithm for subsequent feature selection. The detailed performances using five-fold cross validation are elaborated in Table S5.

#### S4.3. 5-fold cross validation performances with varying model complexities

In order to confirm that our model does not have overfitting issue, we tested the performance of the base ExtraTrees model under different hyperparameter "min\_samples\_split", and the results are shown in Figure S3. The smaller this parameter is, the higher the model complexity will be. Through the decreasing 'min\_samples\_split', the cross-validation score starts to decrease. Beyond the regime of min\_samples\_split < 4, this is the overfitting regime. The hyperparameter min\_samples\_split=5 is used in our final model, which does not belong to the overfitting regime.

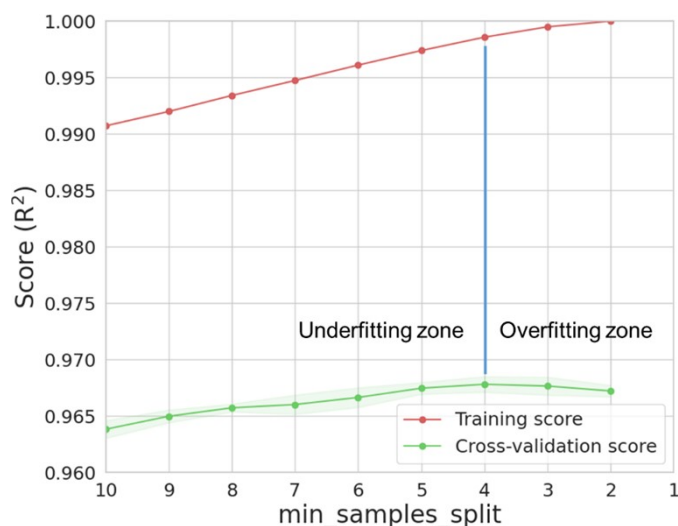

**Figure S3.** Training and validation scores with decreasing 'min\_samples\_split' for the base ExtraTrees model.

#### S4.4. Learning curve

The learning curve of the AdaBoost model is shown in Figure S4. The learning curve is built by random extraction of subsets from the total dataset for cross validation. In each subset, we performed 100 times five-fold cross validations to obtain the average mean value as well as the error (Table S12). It appears that smaller subset has poor prediction ability, which is probably due to the incapability of machine learning model to extract the meaningful pattern from the limited data in small subset. However,  $R^2$  score exceeds 0.95 after an amount of 1000 data are used to train the model. With increasing number of the training examples, the following limited improvement of  $R^2$  suggested that a sample space of near 3000 data is sufficient to get the model close to convergence.

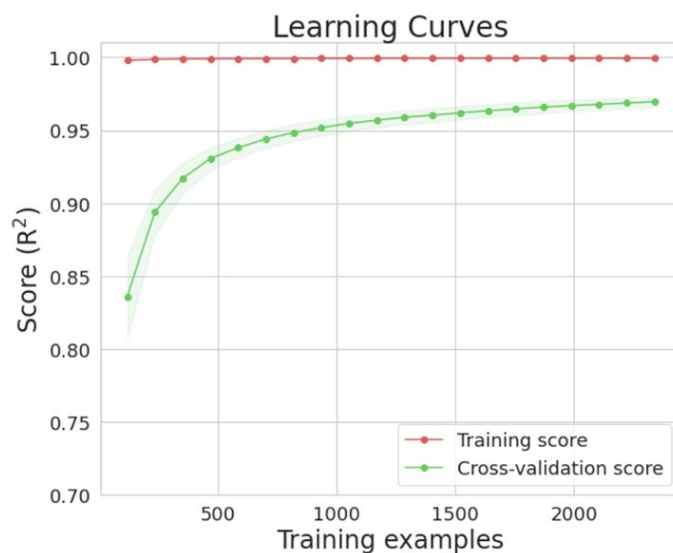

**Figure S4.** Learning curves of the final PhysOrg-AdaBoost model.

**Table S12.** Average and SD value of the performance of 100 times 5-fold cross validation.

| Percentage<br>of used data | Training scores |             | Validation scores |          |
|----------------------------|-----------------|-------------|-------------------|----------|
|                            | average         | SD          | average           | SD       |
| 5%                         | 0.998039        | 0.000408906 | 0.834551          | 0.027683 |
| 10%                        | 0.998751        | 0.000182712 | 0.89606           | 0.012361 |
| 15%                        | 0.998953        | 0.000118332 | 0.918265          | 0.009305 |
| 20%                        | 0.999073        | 0.0000921   | 0.930829          | 0.007785 |
| 25%                        | 0.999151        | 0.0000775   | 0.938682          | 0.006091 |
| 30%                        | 0.999206        | 0.0000601   | 0.943898          | 0.006234 |
| 35%                        | 0.999245        | 0.0000563   | 0.948288          | 0.006119 |
| 40%                        | 0.999281        | 0.0000456   | 0.951642          | 0.005767 |
| 45%                        | 0.999304        | 0.0000478   | 0.954531          | 0.005764 |
| 50%                        | 0.999326        | 0.0000438   | 0.956678          | 0.005603 |
| 55%                        | 0.999343        | 0.0000415   | 0.958662          | 0.005415 |
| 60%                        | 0.999359        | 0.0000366   | 0.96069           | 0.005216 |
| 65%                        | 0.999375        | 0.0000324   | 0.962209          | 0.005045 |
| 70%                        | 0.999388        | 0.0000305   | 0.963591          | 0.004744 |
| 75%                        | 0.999398        | 0.0000275   | 0.964708          | 0.004534 |
| 80%                        | 0.999412        | 0.0000236   | 0.9659            | 0.00431  |
| 85%                        | 0.999419        | 0.000021    | 0.966953          | 0.004201 |
| 90%                        | 0.99943         | 0.0000195   | 0.967952          | 0.004054 |
| 95%                        | 0.999436        | 0.0000196   | 0.968716          | 0.003948 |
| 100%                       | 0.999442        | 0.0000171   | 0.96948           | 0.003898 |

#### S4.5. Features of established machine learning model

The importance score of all features is shown in Table S13. The feature E04, E05, E11, Q10, Q11, B02 were eliminated during feature selection.

**Table S13.** Details of feature importance score.

| No | Feature | Score  |
|----|---------|--------|----|---------|--------|----|---------|--------|----|---------|--------|----|---------|--------|
| 1  | BDE     | 0.2447 | 11 | B04     | 0.0205 | 21 | B07     | 0.0125 | 31 | E03     | 0.0089 | 41 | V02     | 0.0057 |
| 2  | E10     | 0.0909 | 12 | E16     | 0.0196 | 22 | E18     | 0.0117 | 32 | E13     | 0.0089 | 42 | Q02     | 0.0057 |
| 3  | E07     | 0.0743 | 13 | B01     | 0.0163 | 23 | E15     | 0.0111 | 33 | E01     | 0.0086 | 43 | E17     | 0.0056 |
| 4  | E09     | 0.0482 | 14 | V07     | 0.0151 | 24 | Q05     | 0.0108 | 34 | V09     | 0.0077 | 44 | Q04     | 0.0053 |
| 5  | Q01     | 0.0380 | 15 | B09     | 0.0142 | 25 | Q07     | 0.0107 | 35 | E06     | 0.0067 | 45 | Q08     | 0.0051 |
| 6  | E08     | 0.0331 | 16 | V08     | 0.0135 | 26 | B05     | 0.0105 | 36 | V12     | 0.0066 | 46 | E02     | 0.0051 |
| 7  | E21     | 0.0283 | 17 | Q09     | 0.0131 | 27 | E19     | 0.0103 | 37 | V03     | 0.0065 | 47 | Q12     | 0.0049 |
| 8  | B03     | 0.0219 | 18 | B08     | 0.0127 | 28 | Q06     | 0.0095 | 38 | V06     | 0.0064 | 48 | Q03     | 0.0048 |
| 9  | B06     | 0.0208 | 19 | V11     | 0.0126 | 29 | E22     | 0.0093 | 39 | E12     | 0.0063 | 49 | V04     | 0.0046 |
| 10 | E20     | 0.0207 | 20 | V10     | 0.0126 | 30 | E14     | 0.0090 | 40 | V05     | 0.0059 | 50 | V01     | 0.0041 |

The correlation between the DFT-computed HAT barriers and the corresponding reaction free energies is shown in Figure S5. It can be clearly seen that the kinetics-thermodynamics correlation of HAT reaction is not a simple analytic function.

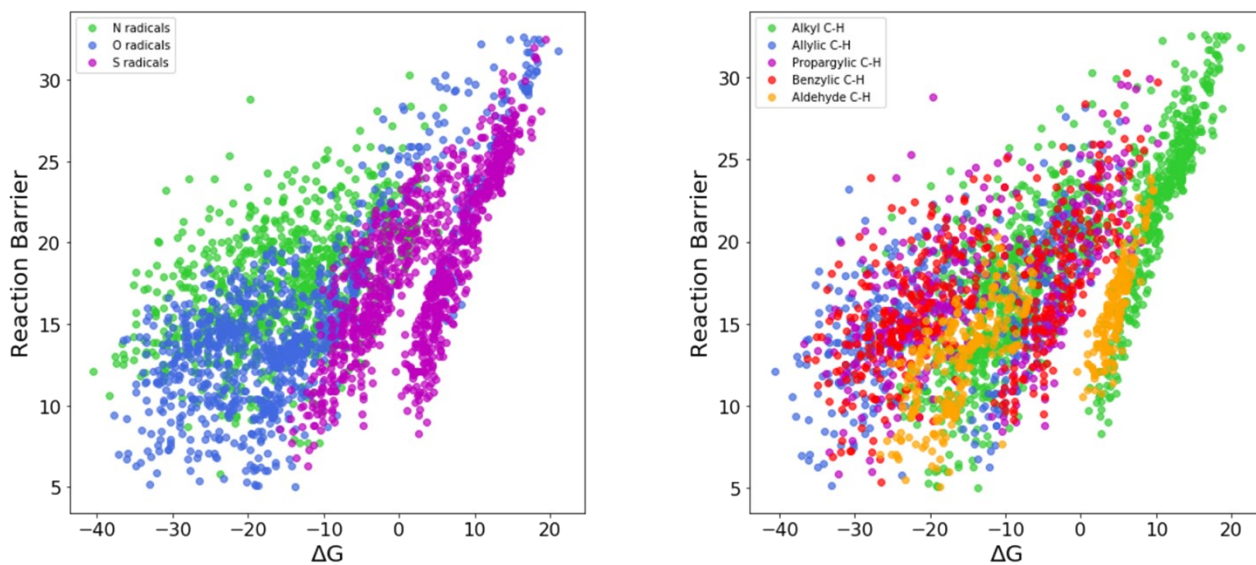

**Figure S5.** Correlation between the DFT-computed HAT barriers and the corresponding reaction free energies ( $\Delta G$ ). Different colors refer to different types of radicals or substrate scaffolds.

#### S4.6. Labels in training set

Each radical or fragment corresponds to a specific label, which can be seen in Figure S6. The specific reaction barriers can be found in the provided file according to the combined labels.

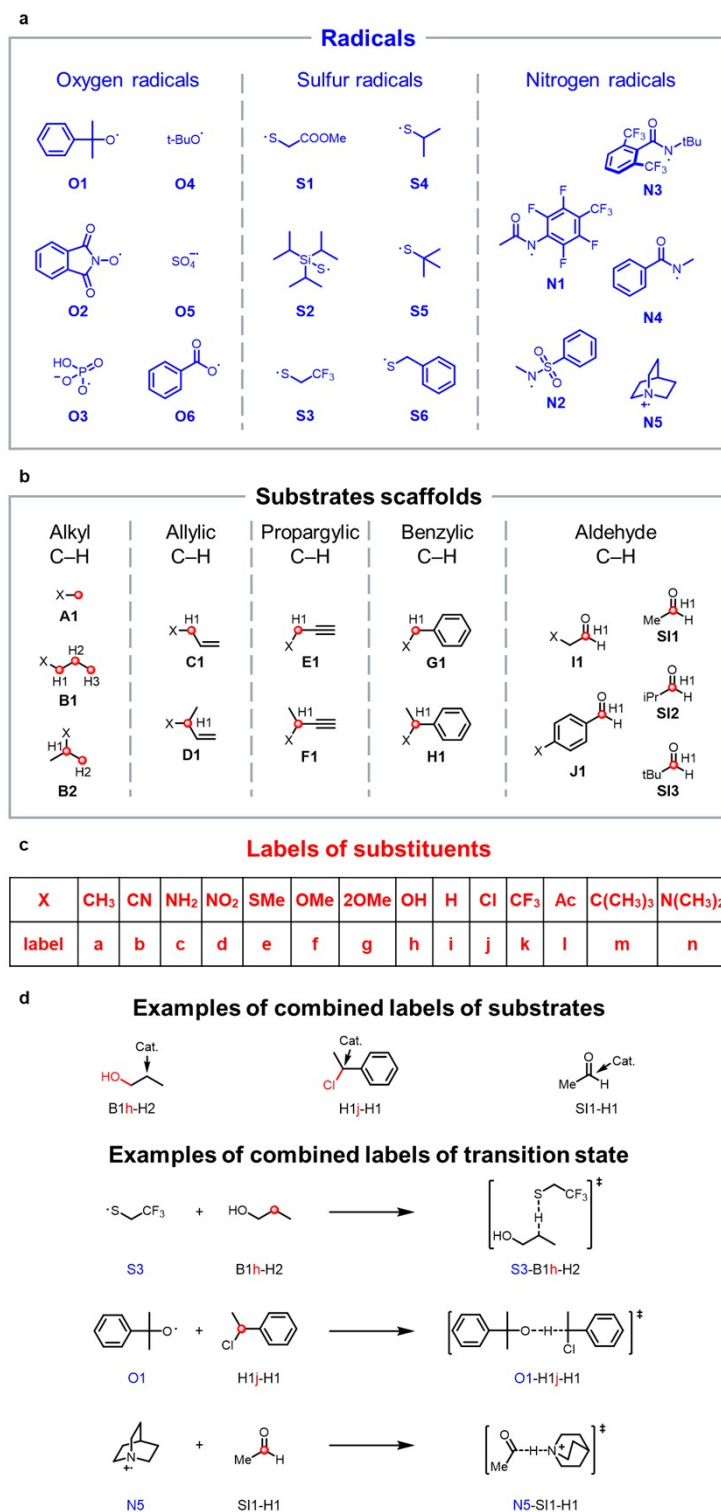

**Figure S6.** Labels of radical, substrate and transition state. (a) Labels of radicals. (b) Labels of substrate scaffolds. (c) Labels of substituent groups of substrates. (d) Examples of combined labels of substrates and transition states, the latter were named in the order of firstly the radical, secondly the substrate, last the reaction site.

## Section S5. Detailed information in testing the conformational dependence of the PhysOrg-AdaBoost model

The structurally flexible substrates and their corresponding radicals were picked from published articles<sup>35-38</sup> on C-H functionalization



via HAT reaction. We used the program molclus<sup>39</sup> in the conformational search for each flexible substrate. The most favorable and tested high-energy conformers were both used to obtain the corresponding PhysOrg descriptors, in order to have two ML-predicted barriers. The geometries of the most favorable and tested high-energy conformers are shown in Figure S7. Structure RMSD of the conformers were calculated using VMD.<sup>40</sup> The vectorial angles were calculated from cosine acquired by scipy<sup>41</sup> package.

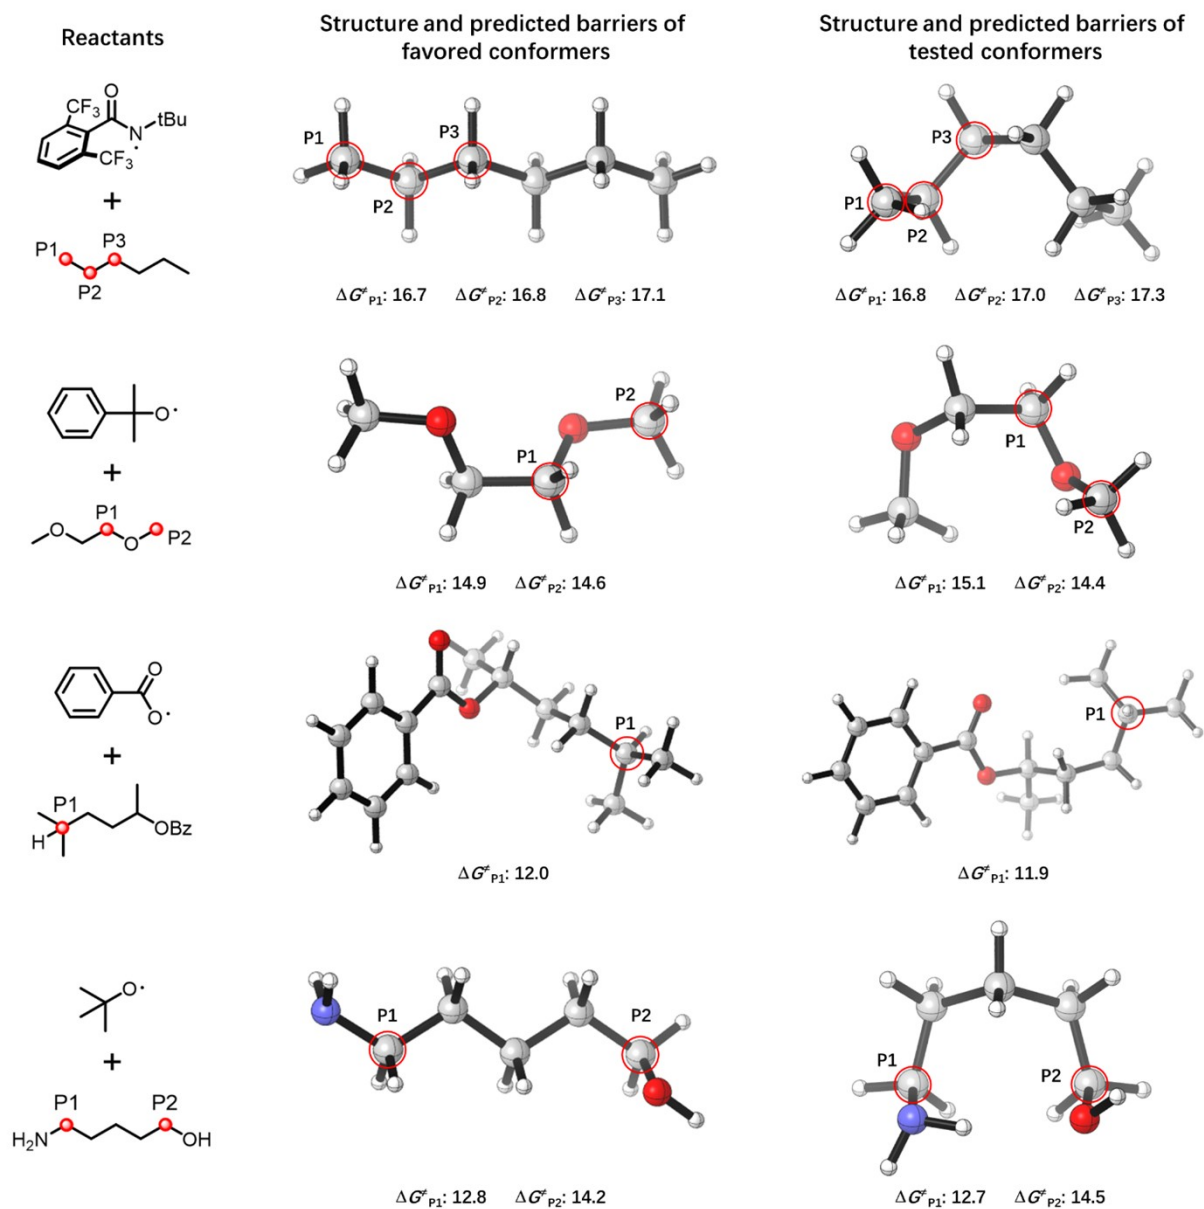

**Figure S7.** The DFT-optimized structures and predicted reaction barriers of the tested conformationally flexible substrates.

### Section S6. Detailed performances of the PhysOrg-AdaBoost model in the test set of C–H functionalization substrates that were not present in the designed chemical space

Details of DFT-computed and ML-predicted barriers are shown in Table S14 and Figure S8. Labels of radicals are shown in Figure S6a. The substrates and their corresponding radicals were picked from published articles<sup>35-38,42-52</sup> on the C–H functionalization via HAT reaction.

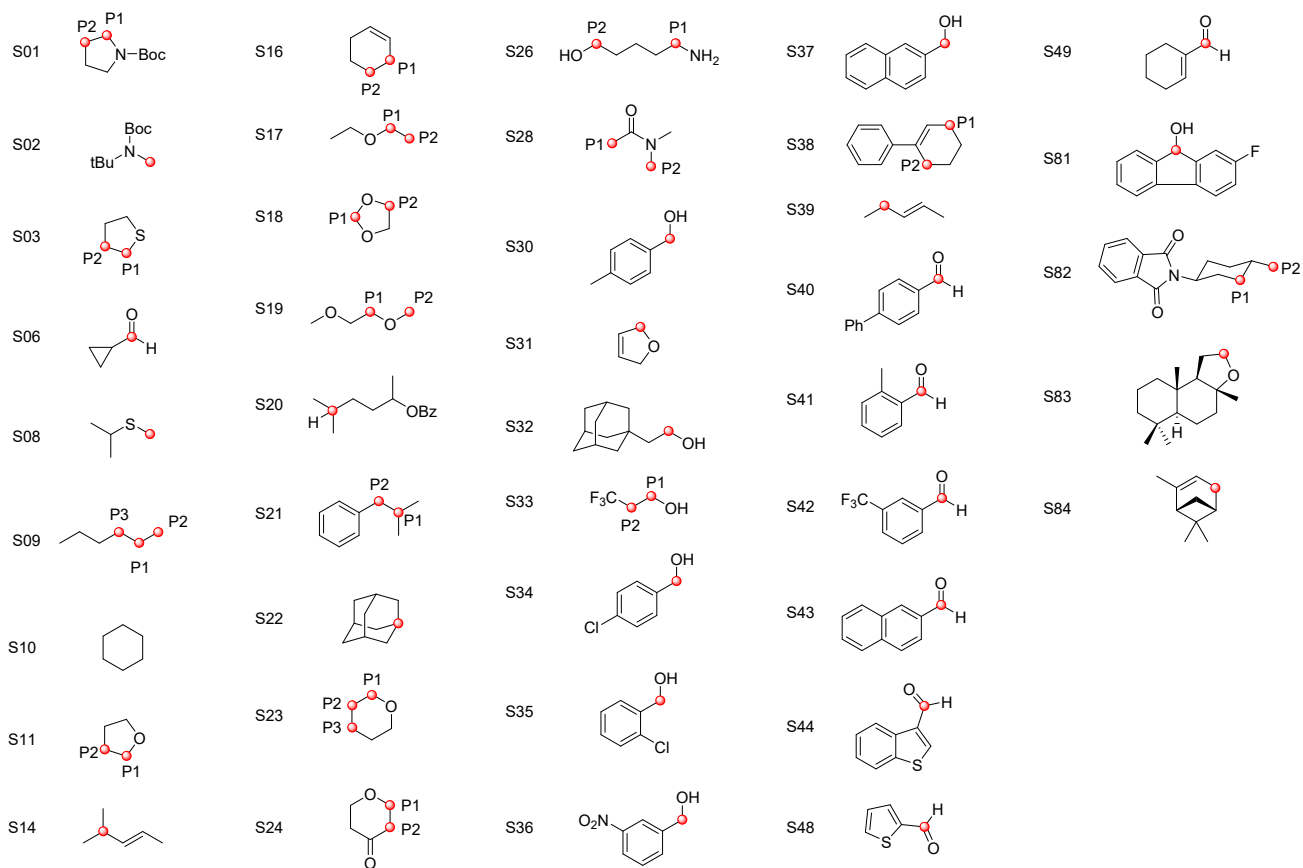

**Figure S8.** The labels of substrates in the test set. There are 41 substrates and 59 reaction sites studied in total.

**Table S14.** Details of DFT-computed and ML-predicted barriers in the test set of C–H functionalization substrates (barriers are in kcal/mol).

| No | Substrate | Position | Radical | DFT-Barrier | ML-Barrier | No | Substrate | Position | Radical | DFT-Barrier | ML-Barrier |
|----|-----------|----------|---------|-------------|------------|----|-----------|----------|---------|-------------|------------|
| 1  | S01       | P1       | N5      | 12.5        | 11.7       | 35 | S23       | P3       | O5      | 10.6        | 12.1       |
| 2  | S01       | P2       | N5      | 17.9        | 18.8       | 36 | S24       | P1       | O5      | 12.9        | 11.1       |
| 3  | S02       | P1       | N5      | 13.4        | 13.5       | 37 | S24       | P2       | O5      | 14.7        | 14.9       |
| 4  | S03       | P1       | N5      | 9.4         | 11.9       | 38 | S26       | P1       | O1      | 12.9        | 12.8       |
| 5  | S03       | P2       | N5      | 18.8        | 18.4       | 39 | S26       | P2       | O1      | 12.8        | 14.2       |
| 6  | S06       | P1       | N5      | 14.1        | 13.9       | 40 | S28       | P1       | O1      | 18.9        | 18.7       |
| 7  | S08       | P1       | N5      | 12.6        | 13.6       | 41 | S28       | P2       | O1      | 14.6        | 14.7       |
| 8  | S09       | P1       | N3      | 16.2        | 16.7       | 42 | S30       | P1       | S1      | 11.7        | 12.0       |
| 9  | S09       | P2       | N3      | 16.8        | 16.8       | 43 | S31       | P1       | S1      | 11.8        | 11.7       |
| 10 | S09       | P3       | N3      | 17.2        | 17.1       | 44 | S32       | P1       | S1      | 15.2        | 16.0       |
| 11 | S10       | P1       | O3      | 10.9        | 11.1       | 45 | S33       | P1       | S1      | 16.0        | 18.9       |
| 12 | S11       | P1       | O4      | 13.2        | 13.5       | 46 | S33       | P1       | S3      | 19.0        | 18.3       |
| 13 | S11       | P1       | O5      | 8.4         | 7.4        | 47 | S33       | P2       | S1      | 26.7        | 27.1       |
| 14 | S11       | P2       | O4      | 16.1        | 16.3       | 48 | S33       | P2       | S3      | 27.4        | 26.4       |
| 15 | S11       | P2       | O5      | 12.6        | 12.4       | 49 | S34       | P1       | O4      | 14.7        | 14.3       |
| 16 | S14       | P1       | S2      | 12.7        | 13.1       | 50 | S35       | P1       | O4      | 15.2        | 14.7       |
| 17 | S16       | P1       | S1      | 13.8        | 14.8       | 51 | S36       | P1       | O4      | 15.6        | 16.5       |
| 18 | S16       | P1       | S2      | 12.5        | 14.6       | 52 | S37       | P1       | O4      | 14.7        | 14.4       |
| 19 | S16       | P1       | S3      | 12.6        | 14.1       | 53 | S38       | P1       | S2      | 12.9        | 14.7       |

|    |     |    |    |      |      |    |     |    |    |      |      |
|----|-----|----|----|------|------|----|-----|----|----|------|------|
| 20 | S16 | P2 | S1 | 20.2 | 20.5 | 54 | S38 | P2 | S2 | 16.4 | 16.4 |
| 21 | S16 | P2 | S2 | 19.7 | 20.3 | 55 | S39 | P1 | S2 | 13.7 | 14.1 |
| 22 | S16 | P2 | S3 | 19.3 | 19.8 | 56 | S40 | P1 | O6 | 9.4  | 10.0 |
| 23 | S17 | P1 | O4 | 13.5 | 13.6 | 57 | S41 | P1 | O6 | 8.9  | 9.4  |
| 24 | S17 | P2 | O4 | 18.9 | 17.8 | 58 | S42 | P1 | O6 | 10.2 | 10.2 |
| 25 | S18 | P1 | O4 | 12.8 | 13.9 | 59 | S43 | P1 | O6 | 10.3 | 9.9  |
| 26 | S18 | P2 | O4 | 14.6 | 14.8 | 60 | S44 | P1 | O6 | 10.0 | 9.6  |
| 27 | S19 | P1 | O4 | 14.5 | 14.9 | 61 | S48 | P1 | O6 | 10.7 | 9.7  |
| 28 | S19 | P2 | O4 | 15.2 | 14.6 | 62 | S49 | P1 | O6 | 8.7  | 8.9  |
| 29 | S20 | P1 | O6 | 10.1 | 12.0 | 63 | S81 | P1 | O4 | 13.5 | 16.2 |
| 30 | S21 | P1 | O3 | 9.7  | 10.5 | 64 | S82 | P1 | N4 | 16.5 | 18.7 |
| 31 | S21 | P2 | O3 | 11.1 | 12.2 | 65 | S82 | P2 | N4 | 18.9 | 19.7 |
| 32 | S22 | P1 | O3 | 8.0  | 10.7 | 66 | S83 | P1 | O6 | 9.2  | 10.8 |
| 33 | S23 | P1 | O5 | 9.5  | 8.9  | 67 | S84 | P1 | S2 | 13.4 | 14.1 |
| 34 | S23 | P2 | O5 | 12.2 | 13.1 | □  | □   | □  | □  | □    | □    |

For the above HAT reactions, there are 20 reactions with substrate that contains multiple C–H sites.  $\Delta\Delta G$  were obtained from the DFT-computed and ML-predicted barriers. The results are shown in Figure S9. 19 out of the 20 reactions were accurately predicted.

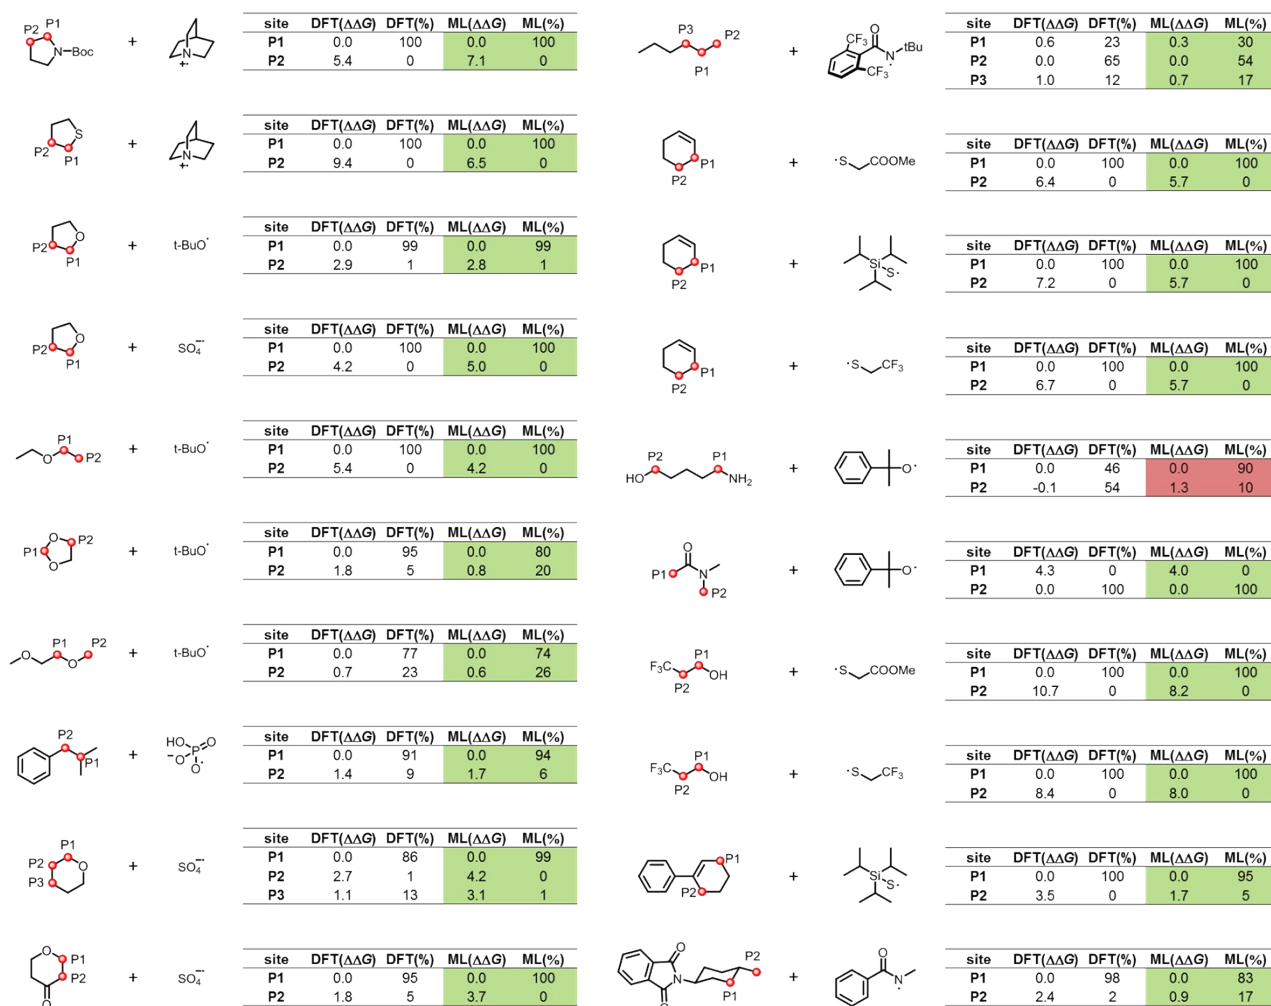

**Figure S9.** DFT-computed and ML-predicted HAT selectivities for selected transformations involving substrate containing multiple C–H sites.

## Section S7. Detailed performances of the PhysOrg-AdaBoost model in test set of HAT reactions that have experimental kinetics data

Details of experimental and ML-predicted relative barriers are shown in Table S15 and Figure S10. The experimental barriers  $\Delta G^\ddagger$  (EXP-Barrier) were calculated as

$$\Delta G^\ddagger = -RT \ln \frac{kh}{k_B T}$$

where  $k$  is experimentally determined reaction rate,  $h$  is Planck constant,  $k_B$  is Boltzmann constant,  $R$  is gas constant and  $T$  is temperature in K. The substrates and the cumyloxy radical were picked from published articles<sup>53-67</sup> which provided experimentally determined HAT reaction rates. The reaction between substrates and cumyloxy radical is listed below.

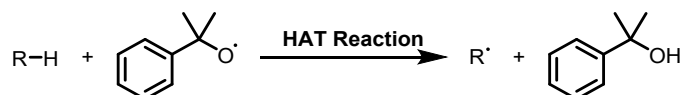

For 117 substrates with HAT reaction rate in this part, every potential active site of each substrates was picked out and used to get ML-predicted HAT barrier. C-H in tertiary C or  $\alpha$  to electron withdrawing groups were regarded as reactive, and every C-H was taken into consideration for those substrates which have no obviously active site. The lowest ML-predicted barrier was considered as the overall reaction barrier of the substrate, which was compared with the experimental results. The experimentally determined HAT reaction rates were transformed to rate-transformed barriers. In consideration of the systematic errors, we used relative barrier to demonstrate the model performance in test set of HAT reaction rate. The substrate 1-(tert-butyl)piperidine(K64) was chose as reference substrate, and relative barriers(the barrier of each substrate minus the barrier of 1-(tert-butyl)piperidine) were calculated.

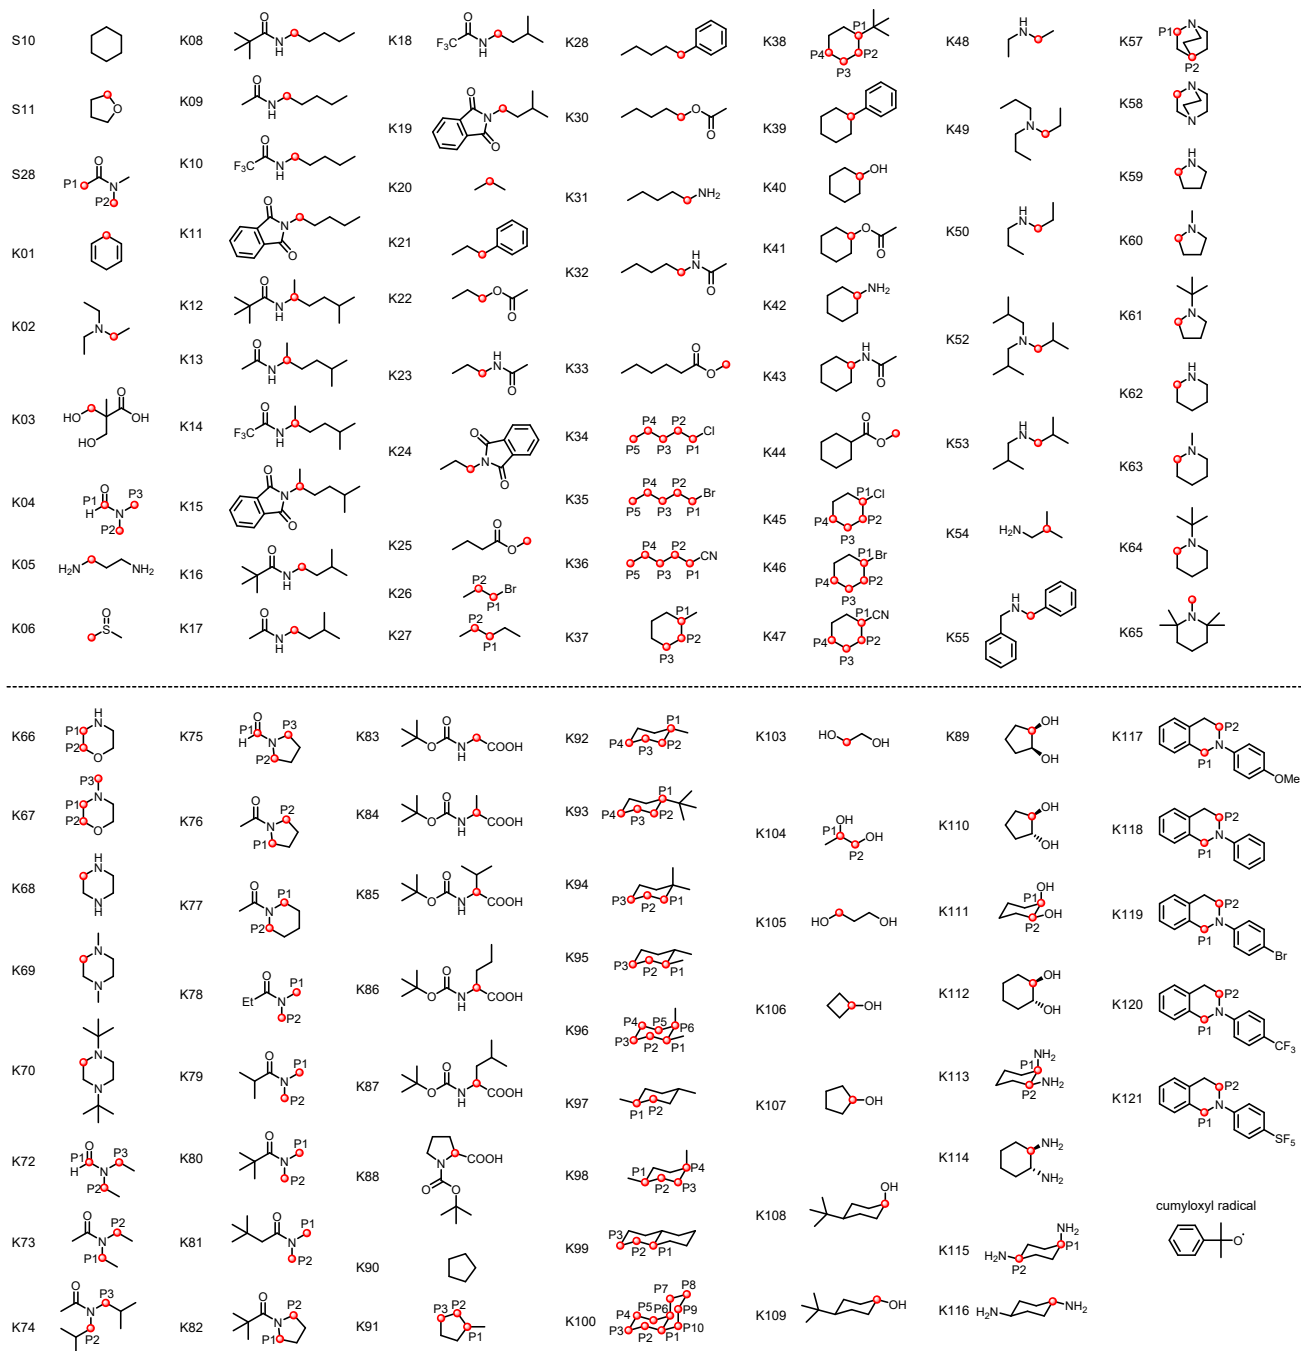

**Figure S10.** The radical (bottom right) and the labels of substrates in test set of HAT reaction rate. There are 117 substrates and 208 reaction sites concerned in total.

**Table S15.** Details of ML-predicted and Exp-determined reaction activities in test set of HAT reaction rate (barriers are in kcal/mol, the radical is cumyloxy radical).

| Substrate | Position | ML-Barrier | ML-Min | ML-Relative Barrier (K64) | EXP-k ( $10^6 \cdot s^{-1} \cdot M^{-1}$ ) | EXP-Barrier | EXP-Relative Barrier (K64) |
|-----------|----------|------------|--------|---------------------------|--------------------------------------------|-------------|----------------------------|
| S10       | P1       | 16.0       | 16.0   | <b>3.7</b>                | 1.1 <sup>51</sup>                          | 9.2         | <b>2.8</b>                 |
| S11       | P1       | 13.4       | 13.4   | <b>1.1</b>                | 5.8 <sup>51</sup>                          | 8.2         | <b>1.8</b>                 |
| S28       | P1       | 18.7       | 14.7   | <b>2.4</b>                | 1.2 <sup>52</sup>                          | 9.2         | <b>2.8</b>                 |
| S28       | P2       | 14.7       |        |                           |                                            |             |                            |
| K01       | P1       | 14.0       | 14.0   | <b>1.6</b>                | 65.6 <sup>53</sup>                         | 6.8         | <b>0.4</b>                 |
| K02       | P1       | 12.5       | 12.5   | <b>0.2</b>                | 219 <sup>53</sup>                          | 6.1         | <b>-0.3</b>                |

|     |    |      |      |            |                     |      |            |
|-----|----|------|------|------------|---------------------|------|------------|
| K03 | P1 | 16.2 | 16.2 | <b>3.8</b> | 26.9 <sup>54</sup>  | 7.3  | <b>0.9</b> |
| K04 | P1 | 13.8 | 13.8 | <b>1.5</b> | 1.24 <sup>55</sup>  | 9.1  | <b>2.7</b> |
| K04 | P2 | 15.1 |      |            |                     |      |            |
| K04 | P3 | 15.0 |      |            |                     |      |            |
| K05 | P1 | 12.9 | 12.9 | <b>0.6</b> | 35.5 <sup>56</sup>  | 7.1  | <b>0.7</b> |
| K06 | P1 | 18.8 | 18.8 | <b>6.4</b> | 0.018 <sup>57</sup> | 11.6 | <b>5.2</b> |
| K08 | P1 | 14.2 | 14.2 | <b>1.9</b> | 0.76 <sup>58</sup>  | 9.4  | <b>3.0</b> |
| K09 | P1 | 14.2 | 14.2 | <b>1.8</b> | 0.958 <sup>58</sup> | 9.3  | <b>2.9</b> |
| K10 | P1 | 16.3 | 16.3 | <b>4.0</b> | 0.295 <sup>58</sup> | 10.0 | <b>3.6</b> |
| K11 | P1 | 16.5 | 16.5 | <b>4.1</b> | 0.23 <sup>58</sup>  | 10.1 | <b>3.7</b> |
| K12 | P1 | 13.8 | 13.8 | <b>1.5</b> | 0.34 <sup>58</sup>  | 9.9  | <b>3.5</b> |
| K13 | P1 | 13.7 | 13.7 | <b>1.4</b> | 0.41 <sup>58</sup>  | 9.8  | <b>3.4</b> |
| K14 | P1 | 15.5 | 15.5 | <b>3.1</b> | 0.39 <sup>58</sup>  | 9.8  | <b>3.4</b> |
| K15 | P1 | 16.5 | 16.5 | <b>4.1</b> | 0.26 <sup>58</sup>  | 10.1 | <b>3.7</b> |
| K16 | P1 | 14.6 | 14.6 | <b>2.2</b> | 0.86 <sup>58</sup>  | 9.3  | <b>3.0</b> |
| K17 | P1 | 14.4 | 14.4 | <b>2.1</b> | 1.08 <sup>58</sup>  | 9.2  | <b>2.8</b> |
| K18 | P1 | 16.4 | 16.4 | <b>4.1</b> | 0.41 <sup>58</sup>  | 9.8  | <b>3.4</b> |
| K19 | P1 | 16.6 | 16.6 | <b>4.3</b> | 0.25 <sup>58</sup>  | 10.1 | <b>3.7</b> |
| K20 | P1 | 15.4 | 15.4 | <b>3.0</b> | 0.1 <sup>58</sup>   | 10.6 | <b>4.2</b> |
| K21 | P1 | 15.2 | 15.2 | <b>2.9</b> | 0.616 <sup>58</sup> | 9.5  | <b>3.1</b> |
| K22 | P1 | 16.1 | 16.1 | <b>3.8</b> | 0.03 <sup>58</sup>  | 11.3 | <b>4.9</b> |
| K23 | P1 | 14.1 | 14.1 | <b>1.7</b> | 0.57 <sup>58</sup>  | 9.6  | <b>3.2</b> |
| K24 | P1 | 16.5 | 16.5 | <b>4.2</b> | 0.03 <sup>58</sup>  | 11.3 | <b>4.9</b> |
| K25 | P1 | 17.3 | 17.3 | <b>5.0</b> | 0.03 <sup>58</sup>  | 11.3 | <b>4.9</b> |
| K26 | P1 | 16.9 | 16.8 | <b>4.5</b> | 0.04 <sup>58</sup>  | 11.2 | <b>4.8</b> |
| K26 | P2 | 16.8 |      |            |                     |      |            |
| K27 | P1 | 16.0 | 15.8 | <b>3.5</b> | 0.31 <sup>58</sup>  | 10.0 | <b>3.6</b> |
| K27 | P2 | 15.8 |      |            |                     |      |            |
| K28 | P1 | 15.3 | 15.3 | <b>2.9</b> | 0.79 <sup>58</sup>  | 9.4  | <b>3.0</b> |
| K30 | P1 | 16.2 | 16.2 | <b>3.9</b> | 0.206 <sup>58</sup> | 10.2 | <b>3.8</b> |
| K31 | P1 | 12.8 | 12.8 | <b>0.5</b> | 15.5 <sup>58</sup>  | 7.6  | <b>1.2</b> |
| K32 | P1 | 14.2 | 14.2 | <b>1.8</b> | 0.958 <sup>58</sup> | 9.3  | <b>2.9</b> |
| K33 | P1 | 17.3 | 17.3 | <b>4.9</b> | 0.197 <sup>58</sup> | 10.2 | <b>3.8</b> |
| K34 | P1 | 17.0 | 16.3 | <b>4.0</b> | 0.184 <sup>58</sup> | 10.3 | <b>3.9</b> |
| K34 | P2 | 17.1 |      |            |                     |      |            |
| K34 | P3 | 17.0 |      |            |                     |      |            |
| K34 | P4 | 16.3 |      |            |                     |      |            |
| K34 | P5 | 17.3 |      |            |                     |      |            |
| K35 | P1 | 16.9 | 16.3 | <b>4.0</b> | 0.176 <sup>58</sup> | 10.3 | <b>3.9</b> |
| K35 | P2 | 17.3 |      |            |                     |      |            |
| K35 | P3 | 17.3 |      |            |                     |      |            |
| K35 | P4 | 16.3 |      |            |                     |      |            |
| K35 | P5 | 17.4 |      |            |                     |      |            |

|     |    |      |      |             |                     |      |             |
|-----|----|------|------|-------------|---------------------|------|-------------|
| K36 | P1 | 17.9 | 16.7 | <b>4.4</b>  | 0.182 <sup>58</sup> | 10.3 | <b>3.9</b>  |
| K36 | P2 | 17.6 |      |             |                     |      |             |
| K36 | P3 | 17.2 |      |             |                     |      |             |
| K36 | P4 | 16.7 |      |             |                     |      |             |
| K36 | P5 | 17.5 |      |             |                     |      |             |
| K37 | P1 | 15.0 | 15.0 | <b>2.7</b>  | 1.01 <sup>58</sup>  | 9.3  | <b>2.9</b>  |
| K37 | P2 | 16.6 |      |             |                     |      |             |
| K37 | P3 | 16.2 |      |             |                     |      |             |
| K37 | P4 | 16.3 |      |             |                     |      |             |
| K38 | P1 | 15.8 | 15.8 | <b>3.4</b>  | 0.82 <sup>58</sup>  | 9.4  | <b>3.0</b>  |
| K38 | P2 | 16.8 |      |             |                     |      |             |
| K38 | P3 | 16.5 |      |             |                     |      |             |
| K38 | P4 | 16.5 |      |             |                     |      |             |
| K39 | P1 | 15.1 | 15.1 | <b>2.8</b>  | 0.91 <sup>58</sup>  | 9.3  | <b>2.9</b>  |
| K40 | P1 | 14.1 | 14.1 | <b>1.8</b>  | 2.66 <sup>58</sup>  | 8.7  | <b>2.3</b>  |
| K41 | P1 | 16.4 | 16.4 | <b>4.1</b>  | 0.42 <sup>58</sup>  | 9.8  | <b>3.4</b>  |
| K42 | P1 | 12.6 | 12.6 | <b>0.3</b>  | 21 <sup>58</sup>    | 7.5  | <b>1.1</b>  |
| K43 | P1 | 14.2 | 14.2 | <b>1.9</b>  | 0.69 <sup>58</sup>  | 9.5  | <b>3.1</b>  |
| K44 | P1 | 17.3 | 17.3 | <b>4.9</b>  | 0.614 <sup>58</sup> | 9.5  | <b>3.2</b>  |
| K45 | P1 | 16.2 | 16.2 | <b>3.9</b>  | 0.462 <sup>58</sup> | 9.7  | <b>3.3</b>  |
| K45 | P2 | 17.7 |      |             |                     |      |             |
| K45 | P3 | 17.3 |      |             |                     |      |             |
| K45 | P4 | 17.1 |      |             |                     |      |             |
| K46 | P1 | 16.4 | 16.4 | <b>4.0</b>  | 0.33 <sup>57</sup>  | 9.9  | <b>3.5</b>  |
| K46 | P2 | 17.7 |      |             |                     |      |             |
| K46 | P3 | 17.3 |      |             |                     |      |             |
| K46 | P4 | 17.0 |      |             |                     |      |             |
| K47 | P1 | 16.8 | 16.8 | <b>4.5</b>  | 0.39 <sup>58</sup>  | 9.8  | <b>3.4</b>  |
| K47 | P2 | 17.7 |      |             |                     |      |             |
| K47 | P3 | 17.3 |      |             |                     |      |             |
| K47 | P4 | 17.3 |      |             |                     |      |             |
| K48 | P1 | 12.6 | 12.6 | <b>0.3</b>  | 110 <sup>59</sup>   | 6.5  | <b>0.1</b>  |
| K49 | P1 | 12.4 | 12.4 | <b>0.0</b>  | 230 <sup>59</sup>   | 6.0  | <b>-0.4</b> |
| K50 | P1 | 12.6 | 12.6 | <b>0.3</b>  | 101 <sup>59</sup>   | 6.5  | <b>0.1</b>  |
| K52 | P1 | 12.7 | 12.7 | <b>0.4</b>  | 127 <sup>59</sup>   | 6.4  | <b>0.0</b>  |
| K53 | P1 | 12.8 | 12.8 | <b>0.5</b>  | 91 <sup>59</sup>    | 6.6  | <b>0.2</b>  |
| K54 | P1 | 12.9 | 12.9 | <b>0.6</b>  | 9.6 <sup>59</sup>   | 7.9  | <b>1.5</b>  |
| K55 | P1 | 13.3 | 13.3 | <b>0.9</b>  | 37.5 <sup>59</sup>  | 7.1  | <b>0.7</b>  |
| K57 | P1 | 15.4 | 15.2 | <b>2.9</b>  | 3.7 <sup>59</sup>   | 8.5  | <b>2.1</b>  |
| K57 | P2 | 15.2 |      |             |                     |      |             |
| K58 | P1 | 15.4 | 15.4 | <b>3.1</b>  | 9.6 <sup>59</sup>   | 7.9  | <b>1.5</b>  |
| K59 | P1 | 12.4 | 12.4 | <b>0.1</b>  | 124 <sup>60</sup>   | 6.4  | <b>0.0</b>  |
| K60 | P1 | 12.2 | 12.2 | <b>-0.1</b> | 191 <sup>60</sup>   | 6.1  | <b>-0.2</b> |

|          |    |      |      |             |                     |      |             |
|----------|----|------|------|-------------|---------------------|------|-------------|
| K61      | P1 | 12.1 | 12.1 | <b>-0.2</b> | 300 <sup>60</sup>   | 5.9  | <b>-0.5</b> |
| K62      | P1 | 12.5 | 12.5 | <b>0.2</b>  | 107 <sup>60</sup>   | 6.5  | <b>0.1</b>  |
| K63      | P1 | 12.7 | 12.7 | <b>0.4</b>  | 122 <sup>60</sup>   | 6.4  | <b>0.0</b>  |
| K64(ref) | P1 | 12.3 | 12.3 | <b>0.0</b>  | 126 <sup>60</sup>   | 6.4  | <b>0.0</b>  |
| K65      | P1 | 12.1 | 12.1 | <b>-0.3</b> | 171 <sup>60</sup>   | 6.2  | <b>-0.2</b> |
| K66      | P1 | 14.2 | 13.0 | <b>0.6</b>  | 50 <sup>60</sup>    | 6.9  | <b>0.5</b>  |
| K66      | P2 | 13.0 |      |             |                     |      |             |
| K67      | P1 | 14.4 | 12.2 | <b>-0.1</b> | 43.2 <sup>60</sup>  | 7.0  | <b>0.6</b>  |
| K67      | P2 | 12.6 |      |             |                     |      |             |
| K67      | P3 | 12.2 |      |             |                     |      |             |
| K68      | P1 | 12.4 | 12.4 | <b>0.1</b>  | 226 <sup>60</sup>   | 6.1  | <b>-0.3</b> |
| K69      | P1 | 12.5 | 12.5 | <b>0.2</b>  | 116 <sup>60</sup>   | 6.4  | <b>0.0</b>  |
| K70      | P1 | 12.6 | 12.6 | <b>0.3</b>  | 132 <sup>60</sup>   | 6.4  | <b>0.0</b>  |
| K72      | P1 | 14.3 | 14.1 | <b>1.7</b>  | 1.25 <sup>61</sup>  | 9.1  | <b>2.7</b>  |
| K72      | P2 | 14.3 |      |             |                     |      |             |
| K72      | P3 | 14.1 |      |             |                     |      |             |
| K73      | P1 | 14.1 | 13.9 | <b>1.5</b>  | 0.664 <sup>61</sup> | 9.5  | <b>3.1</b>  |
| K73      | P2 | 13.9 |      |             |                     |      |             |
| K74      | P1 | 15.0 | 14.8 | <b>2.5</b>  | 0.314 <sup>61</sup> | 9.9  | <b>3.5</b>  |
| K74      | P2 | 14.8 |      |             |                     |      |             |
| K75      | P1 | 13.9 | 13.8 | <b>1.5</b>  | 4.93 <sup>61</sup>  | 8.3  | <b>1.9</b>  |
| K75      | P2 | 13.9 |      |             |                     |      |             |
| K75      | P3 | 13.8 |      |             |                     |      |             |
| K76      | P1 | 14.1 | 13.6 | <b>1.3</b>  | 9 <sup>61</sup>     | 8.0  | <b>1.6</b>  |
| K76      | P2 | 13.6 |      |             |                     |      |             |
| K77      | P1 | 14.2 | 14.2 | <b>1.9</b>  | 3.17 <sup>61</sup>  | 8.6  | <b>2.2</b>  |
| K77      | P2 | 14.5 |      |             |                     |      |             |
| K78      | P1 | 14.0 | 14.0 | <b>1.7</b>  | 1.55 <sup>61</sup>  | 9.0  | <b>2.6</b>  |
| K78      | P2 | 14.6 |      |             |                     |      |             |
| K79      | P1 | 14.2 | 14.2 | <b>1.8</b>  | 1.69 <sup>61</sup>  | 8.9  | <b>2.6</b>  |
| K79      | P2 | 14.5 |      |             |                     |      |             |
| K80      | P1 | 14.3 | 14.3 | <b>1.9</b>  | 1.41 <sup>61</sup>  | 9.1  | <b>2.7</b>  |
| K80      | P2 | 14.4 |      |             |                     |      |             |
| K81      | P1 | 14.1 | 14.1 | <b>1.8</b>  | 1.6 <sup>61</sup>   | 9.0  | <b>2.6</b>  |
| K81      | P2 | 14.4 |      |             |                     |      |             |
| K82      | P1 | 14.4 | 13.6 | <b>1.3</b>  | 5.17 <sup>61</sup>  | 8.3  | <b>1.9</b>  |
| K82      | P2 | 13.6 |      |             |                     |      |             |
| K83      | P1 | 17.2 | 17.2 | <b>4.8</b>  | 0.396 <sup>62</sup> | 9.8  | <b>3.4</b>  |
| K84      | P1 | 16.3 | 16.3 | <b>4.0</b>  | 0.276 <sup>62</sup> | 10.0 | <b>3.6</b>  |
| K85      | P1 | 16.6 | 16.6 | <b>4.2</b>  | 0.199 <sup>62</sup> | 10.2 | <b>3.8</b>  |
| K86      | P1 | 16.4 | 16.4 | <b>4.1</b>  | 0.33 <sup>62</sup>  | 9.9  | <b>3.5</b>  |
| K87      | P1 | 16.6 | 16.6 | <b>4.3</b>  | 0.59 <sup>62</sup>  | 9.6  | <b>3.2</b>  |
| K88      | P1 | 14.4 | 14.4 | <b>2.1</b>  | 2.51 <sup>62</sup>  | 8.7  | <b>2.3</b>  |



|      |     |      |      |            |                     |     |            |
|------|-----|------|------|------------|---------------------|-----|------------|
| K89  | P1  | 14.5 | 14.5 | <b>2.2</b> | 2.49 <sup>63</sup>  | 8.7 | <b>2.3</b> |
| K90  | P1  | 15.2 | 15.2 | <b>2.9</b> | 0.954 <sup>64</sup> | 9.3 | <b>2.9</b> |
| K91  | P1  | 14.3 | 14.3 | <b>2.0</b> | 1.31 <sup>64</sup>  | 9.1 | <b>2.7</b> |
| K91  | P2  | 15.8 |      |            |                     |     |            |
| K91  | P3  | 15.4 |      |            |                     |     |            |
| K92  | P1  | 15.0 | 15.0 | <b>2.7</b> | 1.01 <sup>64</sup>  | 9.3 | <b>2.9</b> |
| K92  | P2  | 16.6 |      |            |                     |     |            |
| K92  | P3  | 16.2 |      |            |                     |     |            |
| K92  | P4  | 16.3 |      |            |                     |     |            |
| K93  | P1  | 15.8 | 15.8 | <b>3.4</b> | 0.82 <sup>64</sup>  | 9.4 | <b>3.0</b> |
| K93  | P2  | 16.8 |      |            |                     |     |            |
| K93  | P3  | 16.5 |      |            |                     |     |            |
| K93  | P4  | 16.5 |      |            |                     |     |            |
| K94  | P1  | 17.3 | 16.4 | <b>4.1</b> | 0.77 <sup>64</sup>  | 9.4 | <b>3.0</b> |
| K94  | P2  | 16.4 |      |            |                     |     |            |
| K94  | P3  | 16.4 |      |            |                     |     |            |
| K95  | P1  | 15.4 | 15.4 | <b>3.1</b> | 1.03 <sup>64</sup>  | 9.2 | <b>2.8</b> |
| K95  | P2  | 16.8 |      |            |                     |     |            |
| K95  | P3  | 16.4 |      |            |                     |     |            |
| K96  | P1  | 15.3 | 15.0 | <b>2.7</b> | 2.34 <sup>64</sup>  | 8.8 | <b>2.4</b> |
| K96  | P2  | 16.6 |      |            |                     |     |            |
| K96  | P3  | 16.3 |      |            |                     |     |            |
| K96  | P4  | 16.3 |      |            |                     |     |            |
| K96  | P5  | 16.9 |      |            |                     |     |            |
| K96  | P6  | 15.0 |      |            |                     |     |            |
| K97  | P1  | 15.1 | 15.1 | <b>2.8</b> | 1.1 <sup>64</sup>   | 9.2 | <b>2.8</b> |
| K97  | P2  | 16.7 |      |            |                     |     |            |
| K98  | P1  | 15.2 | 15.2 | <b>2.8</b> | 2.05 <sup>64</sup>  | 8.8 | <b>2.4</b> |
| K98  | P2  | 16.6 |      |            |                     |     |            |
| K98  | P3  | 16.6 |      |            |                     |     |            |
| K98  | P4  | 15.2 |      |            |                     |     |            |
| K99  | P1  | 15.7 | 15.7 | <b>3.4</b> | 1.58 <sup>64</sup>  | 9.0 | <b>2.6</b> |
| K99  | P2  | 16.6 |      |            |                     |     |            |
| K99  | P3  | 16.2 |      |            |                     |     |            |
| K100 | P1  | 15.5 | 15.5 | <b>3.1</b> | 2.85 <sup>64</sup>  | 8.6 | <b>2.2</b> |
| K100 | P10 | 16.5 |      |            |                     |     |            |
| K100 | P2  | 16.5 |      |            |                     |     |            |
| K100 | P3  | 16.1 |      |            |                     |     |            |
| K100 | P4  | 16.1 |      |            |                     |     |            |
| K100 | P5  | 16.5 |      |            |                     |     |            |
| K100 | P6  | 15.5 |      |            |                     |     |            |
| K100 | P7  | 16.5 |      |            |                     |     |            |
| K100 | P8  | 16.1 |      |            |                     |     |            |

|      |    |      |      |            |                    |     |             |
|------|----|------|------|------------|--------------------|-----|-------------|
| K100 | P9 | 16.1 |      |            |                    |     |             |
| K103 | P1 | 15.4 | 15.4 | <b>3.1</b> | 0.84 <sup>63</sup> | 9.4 | <b>3.0</b>  |
| K104 | P1 | 14.0 | 14.0 | <b>1.7</b> | 1.55 <sup>63</sup> | 9.0 | <b>2.6</b>  |
| K104 | P2 | 15.1 |      |            |                    |     |             |
| K105 | P1 | 14.2 | 14.2 | <b>1.8</b> | 1.95 <sup>63</sup> | 8.9 | <b>2.5</b>  |
| K106 | P1 | 13.8 | 13.8 | <b>1.5</b> | 2.08 <sup>63</sup> | 8.8 | <b>2.4</b>  |
| K107 | P1 | 13.5 | 13.5 | <b>1.1</b> | 2.5 <sup>63</sup>  | 8.7 | <b>2.3</b>  |
| K108 | P1 | 14.1 | 14.1 | <b>1.8</b> | 5.06 <sup>63</sup> | 8.3 | <b>1.9</b>  |
| K109 | P1 | 14.3 | 14.3 | <b>2.0</b> | 2.37 <sup>63</sup> | 8.7 | <b>2.4</b>  |
| K110 | P1 | 14.2 | 14.1 | <b>1.8</b> | 0.93 <sup>63</sup> | 9.3 | <b>2.9</b>  |
| K110 | P2 | 14.1 |      |            |                    |     |             |
| K111 | P1 | 14.6 | 14.6 | <b>2.3</b> | 2.7 <sup>63</sup>  | 8.7 | <b>2.3</b>  |
| K111 | P2 | 15.1 |      |            |                    |     |             |
| K112 | P1 | 15.2 | 15.2 | <b>2.9</b> | 1.43 <sup>63</sup> | 9.0 | <b>2.7</b>  |
| K113 | P1 | 12.5 | 12.5 | <b>0.1</b> | 65.8 <sup>63</sup> | 6.8 | <b>0.4</b>  |
| K113 | P2 | 13.2 |      |            |                    |     |             |
| K114 | P1 | 12.7 | 12.7 | <b>0.4</b> | 34.4 <sup>63</sup> | 7.2 | <b>0.8</b>  |
| K115 | P1 | 12.6 | 12.4 | <b>0.1</b> | 55.4 <sup>63</sup> | 6.9 | <b>0.5</b>  |
| K115 | P2 | 12.4 |      |            |                    |     |             |
| K116 | P1 | 12.7 | 12.7 | <b>0.4</b> | 33.1 <sup>63</sup> | 7.2 | <b>0.8</b>  |
| K117 | P1 | 13.5 | 12.7 | <b>0.4</b> | 480 <sup>65</sup>  | 5.6 | <b>-0.8</b> |
| K117 | P2 | 12.7 |      |            |                    |     |             |
| K118 | P1 | 13.7 | 13.0 | <b>0.7</b> | 280 <sup>65</sup>  | 5.9 | <b>-0.5</b> |
| K118 | P2 | 13.0 |      |            |                    |     |             |
| K119 | P1 | 14.2 | 13.7 | <b>1.3</b> | 217 <sup>65</sup>  | 6.1 | <b>-0.3</b> |
| K119 | P2 | 13.7 |      |            |                    |     |             |
| K120 | P1 | 14.8 | 14.5 | <b>2.2</b> | 201 <sup>65</sup>  | 6.1 | <b>-0.3</b> |
| K120 | P2 | 14.5 |      |            |                    |     |             |
| K121 | P1 | 15.3 | 15.1 | <b>2.7</b> | 165 <sup>65</sup>  | 6.2 | <b>-0.2</b> |
| K121 | P2 | 15.1 |      |            |                    |     |             |

## Section S8. Detailed performances of the PhysOrg-AdaBoost model on selectivity prediction

Details of DFT-computed and ML-predicted barriers are shown in Table S16 and Table S17. Labels of radicals are shown in Figure S6a.

**Table S16.** Details of ML-predicted and DFT-computed barriers of menthol in test set of selectivity prediction (barriers are in kcal/mol)

| Substrate | Position | Radical | DFT-Barrier | DFT-Percentage | ML-Barrier | ML-Percentage |
|-----------|----------|---------|-------------|----------------|------------|---------------|
| Menthol   | P1       | O5      | 10.6        | <b>0.0%</b>    | 10.8       | <b>2.9%</b>   |
| Menthol   | P2       | O5      | 8.1         | <b>1.0%</b>    | 11.2       | <b>1.4%</b>   |
| Menthol   | P3       | O5      | 7.8         | <b>1.7%</b>    | 9.2        | <b>44.2%</b>  |
| Menthol   | P4       | O5      | 5.4         | <b>97.3%</b>   | 9.1        | <b>51.5%</b>  |

|         |    |    |      |       |      |       |
|---------|----|----|------|-------|------|-------|
| Menthol | P1 | N5 | 15.2 | 0.3%  | 16.3 | 2.5%  |
| Menthol | P2 | N5 | 15.3 | 0.2%  | 16.6 | 1.5%  |
| Menthol | P3 | N5 | 11.8 | 89.5% | 14.5 | 51.8% |
| Menthol | P4 | N5 | 13.1 | 10.0% | 14.6 | 44.2% |
| Menthol | P1 | S5 | 18.8 | 1.2%  | 19.9 | 0.5%  |
| Menthol | P2 | S5 | 19.5 | 0.4%  | 19.7 | 0.6%  |
| Menthol | P3 | S5 | 17.1 | 20.3% | 17.4 | 28.3% |
| Menthol | P4 | S5 | 16.3 | 78.2% | 16.9 | 70.6% |

**Table S17.** Details of ML-predicted and DFT-computed barriers of (+)-Camptothecin in test set of selectivity prediction (barriers are in kcal/mol)

| Substrate        | Position | Radical | DFT-Barrier | DFT-Percentage | ML-Barrier | ML-Percentage |
|------------------|----------|---------|-------------|----------------|------------|---------------|
| (+)-Camptothecin | P1       | O5      | 10.0        | 44.6%          | 14.1       | 62.2%         |
| (+)-Camptothecin | P2       | O5      | 9.9         | 52.8%          | 15.1       | 12.3%         |
| (+)-Camptothecin | P3       | O5      | 11.7        | 2.5%           | 14.9       | 15.7%         |
| (+)-Camptothecin | P4       | O5      | 14.0        | 0.1%           | 15.2       | 9.8%          |
| (+)-Camptothecin | P1       | N5      | 18.2        | 89.6%          | 18.8       | 92.1%         |
| (+)-Camptothecin | P2       | N5      | 19.5        | 10.0%          | 20.4       | 6.3%          |
| (+)-Camptothecin | P3       | N5      | 21.8        | 0.2%           | 21.6       | 0.8%          |
| (+)-Camptothecin | P4       | N5      | 21.8        | 0.2%           | 21.6       | 0.8%          |
| (+)-Camptothecin | P1       | S5      | 18.3        | 79.4%          | 19.1       | 87.8%         |
| (+)-Camptothecin | P2       | S5      | 19.1        | 20.6%          | 20.3       | 12.2%         |
| (+)-Camptothecin | P3       | S5      | 23.3        | 0.0%           | 24.4       | 0.0%          |
| (+)-Camptothecin | P4       | S5      | 25.8        | 0.0%           | 25.5       | 0.0%          |

## Section S9. Dataset and cartesian coordinates of structures

The csv files of training set and test sets along with the details of cartesian coordinates of DFT-computed structures are available at the zip file of **supplementary information** and <https://github.com/HFLSpopcorn/HAT-ReactivityPredictor>.

## Section S10. Performances of the PhysOrg-AdaBoost model using dataset splitting

The generalization ability of AdaBoost model was further examined by splitting the dataset following different substrate scaffolds, substituents, and radicals. The dataset with 2926 reaction barriers and corresponding physorg features was split into training set and test set, and an AdaBoost model was trained on training set (missing one scaffold, substituent type or radical) to predict the reaction barriers in the test set with specific type of substrate scaffolds, substituents, or radicals that were not present in the training set. Details of the size of training set, test set, and prediction abilities are shown in Table S18, Table S19 and Table S20. Labels of scaffolds, substituents and radicals are shown in Figure S6.

**Table S18.** Details of splitting test on substrate scaffolds (MAE and RMSE are in kcal/mol, MSE is in kcal<sup>2</sup>/mol<sup>2</sup>).

| Scaffold | train | test | R <sup>2</sup> | MAE  | MSE  | RMSE |
|----------|-------|------|----------------|------|------|------|
| A        | 2715  | 211  | 0.91           | 1.50 | 3.60 | 1.90 |
| B        | 1922  | 1004 | 0.92           | 1.19 | 2.26 | 1.50 |
| C        | 2709  | 217  | 0.94           | 0.70 | 0.91 | 0.96 |

|   |      |     |      |      |      |      |
|---|------|-----|------|------|------|------|
| D | 2729 | 197 | 0.92 | 0.89 | 1.37 | 1.17 |
| E | 2705 | 221 | 0.97 | 0.63 | 0.64 | 0.80 |
| F | 2731 | 195 | 0.86 | 1.25 | 2.83 | 1.68 |
| G | 2707 | 219 | 0.91 | 1.07 | 1.91 | 1.38 |
| H | 2731 | 195 | 0.95 | 0.69 | 0.78 | 0.89 |
| I | 2676 | 250 | 0.27 | 2.61 | 8.23 | 2.87 |
| J | 2709 | 217 | 0.80 | 1.23 | 2.14 | 1.46 |

**Table S19.** Details of splitting test on substrate substituent (MAE and RMSE are in kcal/mol, MSE is in kcal<sup>2</sup>/mol<sup>2</sup>).

| Substituent | train | test | R <sup>2</sup> | MAE  | MSE  | RMSE |
|-------------|-------|------|----------------|------|------|------|
| a           | 2705  | 221  | 0.96           | 0.66 | 0.69 | 0.83 |
| b           | 2688  | 238  | 0.97           | 0.61 | 0.64 | 0.80 |
| c           | 2705  | 221  | 0.95           | 0.81 | 1.04 | 1.02 |
| d           | 2689  | 237  | 0.77           | 1.69 | 4.66 | 2.16 |
| e           | 2691  | 235  | 0.93           | 0.81 | 1.06 | 1.03 |
| f           | 2691  | 235  | 0.95           | 0.69 | 0.91 | 0.95 |
| g           | 2878  | 48   | 0.77           | 1.59 | 4.01 | 2.00 |
| h           | 2696  | 230  | 0.91           | 0.90 | 1.81 | 1.35 |
| i           | 2841  | 85   | 0.96           | 0.68 | 0.85 | 0.92 |
| j           | 2702  | 224  | 0.92           | 0.95 | 1.41 | 1.19 |
| k           | 2703  | 223  | 0.86           | 1.46 | 3.30 | 1.82 |
| l           | 2702  | 224  | 0.84           | 1.36 | 2.79 | 1.67 |
| m           | 2688  | 238  | 0.81           | 1.17 | 3.72 | 1.93 |
| n           | 2709  | 217  | 0.80           | 1.65 | 4.99 | 2.23 |

**Table S20.** Details of splitting test on radicals (MAE and RMSE are in kcal/mol, MSE is in kcal<sup>2</sup>/mol<sup>2</sup>).

| Radical | train | test | R <sup>2</sup> | MAE  | MSE   | RMSE |
|---------|-------|------|----------------|------|-------|------|
| O1      | 2751  | 175  | 0.50           | 1.33 | 2.28  | 1.51 |
| O2      | 2754  | 172  | -1.68          | 6.98 | 49.83 | 7.06 |
| O3      | 2759  | 167  | 0.85           | 0.89 | 1.48  | 1.22 |
| O4      | 2744  | 182  | 0.70           | 0.85 | 1.44  | 1.20 |
| O5      | 2748  | 178  | 0.87           | 0.89 | 1.43  | 1.20 |
| O6      | 2764  | 162  | -5.09          | 6.26 | 41.32 | 6.43 |
| S1      | 2786  | 140  | 0.98           | 0.61 | 0.66  | 0.81 |
| S2      | 2744  | 182  | 0.89           | 1.36 | 2.49  | 1.58 |
| S3      | 2751  | 175  | 0.97           | 0.72 | 0.78  | 0.88 |
| S4      | 2751  | 175  | 0.99           | 0.44 | 0.28  | 0.53 |
| S5      | 2751  | 175  | 0.95           | 0.94 | 1.08  | 1.04 |
| S6      | 2751  | 175  | 0.98           | 0.50 | 0.38  | 0.61 |
| N1      | 2751  | 175  | 0.70           | 2.02 | 5.05  | 2.25 |
| N2      | 2751  | 175  | 0.58           | 2.07 | 4.91  | 2.21 |
| N3      | 2751  | 175  | 0.57           | 1.79 | 5.14  | 2.27 |
| N4      | 2744  | 182  | 0.91           | 0.68 | 0.74  | 0.86 |
| N5      | 2765  | 161  | 0.81           | 1.17 | 2.62  | 1.62 |

## Section S11. Availability of the developed ML model for HAT reactivity prediction

The features in ML training, the reactivity calculation data and the code for developing machine Learning model is freely available at <https://github.com/HFLSpopcorn/HAT-ReactivityPredictor>.

## References

- 1 M. J. Frisch, G. W. Trucks, H. B. Schlegel, G. E. Scuseria, M. A. Robb, J. R. Cheeseman, G. Scalmani, V. Barone, B. Mennucci, G. A. Petersson, H. Nakatsuji, M. Caricato, X. Li, H. P. Hratchian, A. F. Izmaylov, J. Bloino, G. Zheng, J. L. Sonnenberg, M. Hada, M. Ehara, K. Toyota, R. Fukuda, J. Hasegawa, M. Ishida, T. Nakajima, Y. Honda, O. Kitao, H. Nakai, T. Vreven, J. A. Montgomery Jr., J. E. Peralta, F. Ogliaro, M. Bearpark, J. J. Heyd, E. Brothers, K. N. Kudin, V. N. Staroverov, T. Keith, R. Kobayashi, J. Normand, K. Raghavachari, A. Rendell, J. C. Burant, S. S. Iyengar, J. Tomasi, M. Cossi, N. Rega, J. M. Millam, M. Klene, J. E. Knox, J. B. Cross, V. Bakken, C. Adamo, J. Jaramillo, R. Gomperts, R. E. Stratmann, O. Yazyev, A. J. Austin, R. Cammi, C. Pomelli, J. W. Ochterski, R. L. Martin, K. Morokuma, V. G. Zakrzewski, G. A. Voth, P. Salvador, J. J. Dannenberg, S. Dapprich, A. D. Daniels, O. Farkas, J. B. Foresman, J. V. Ortiz, J. Cioslowski and D. J. Fox, Gaussian 09, Revision D.01, Gaussian, Inc., Wallingford, CT, 2013.
- 2 C. Lee, W. Yang and R. G. Parr, *Phys. Rev. B*, 1988, **37**, 785–789.
- 3 A. D. Becke, *J. Chem. Phys.*, 1993, **98**, 5648–5652.
- 4 Y. Zhao and D. G. Truhlar, *Theor. Chem. Acc.*, 2008, **120**, 215–241.
- 5 F. Weigend, *Phys. Chem. Chem. Phys.*, 2006, **8**, 1057–1065.
- 6 F. Weigend and R. Ahlrichs, *Phys. Chem. Chem. Phys.*, 2005, **7**, 3297–3305.
- 7 A. V. Marenich, C. J. Cramer and D. G. Truhlar, *J. Phys. Chem. B* 2009, **113**, 6378–6396.
- 8 C. Y. Legault, *CYLView*, 1.0b, Université de Sherbrooke, 2009 (<http://www.cylview.org>).
- 9 J. P. Foster and F. Weinhold, *J. Am. Chem. Soc.*, 1980, **102**, 7211–7218.
- 10 K. B. Wiberg, *Tetrahedron*, 1968, **24**, 1083–1096.
- 11 I. Mayer, *Chem. Phys. Lett.*, 1983, **97**, 270–274.
- 12 I. Mayer, *J. Comput. Chem.*, 2007, **28**, 204–221.
- 13 R. G. Parr and W. Yang, *Density Functional Theory of Atoms and Molecules Vol. 16*, Oxford Univ. Press, New York, 1989.
- 14 W. Koch and M. C. Holthausen, *A Chemist's Guide to Density Functional Theory*, Wiley-VCH, Weinheim, 2001.
- 15 P. K. Chattaraj, *Chemical reactivity theory: a density functional view*, CRC Press, Taylor & Francis, 2009.
- 16 R. G. Parr, R. A. Donnelly, M. Levy and W. E. Palke, *J. Chem. Phys.*, 1978, **68**, 3801–3807.
- 17 R. G. Parr and R. G. Pearson, *J. Am. Chem. Soc.*, 1983, **105**, 7512–7516.
- 18 R. G. Pearson, *Proc. Natl. Acad. Sci. U.S.A.* 1986, **83**, 8440.
- 19 M. Torrent-Sucarrat, M. Duran and M. Solà, *J. Phys. Chem. A* 2002, **106**, 4632–4638.
- 20 W. Yang and R. G. Parr, *Proc. Natl. Acad. Sci. U.S.A.* 1985, **82**, 6723.
- 21 M. Berkowitz and R. G. Parr, *J. Chem. Phys.*, 1988, **88**, 2554–2557.
- 22 R. G. Parr, L. v. Szentpály and S. Liu, *J. Am. Chem. Soc.*, 1999, **121**, 1922–1924.
- 23 J. P. Perdew, R. G. Parr, M. Levy and J. L. Balduz, *Phys. Rev. Lett.*, 1982, **49**, 1691–1694.
- 24 A. K. Chandra and M. T. Nguyen, *Faraday Discuss.*, 2007, **135**, 191–201.
- 25 R. G. Parr and W. Yang, *J. Am. Chem. Soc.*, 1984, **106**, 4049–4050.
- 26 W. Yang and W. J. Mortier, *J. Am. Chem. Soc.*, 1986, **108**, 5708–5711.
- 27 C. Morell, A. Grand and A. Toro-Labbé, *J. Phys. Chem. A* 2005, **109**, 205–212.
- 28 C. Morell, A. Grand and A. Toro-Labbé, *Chem. Phys. Lett.*, 2006, **425**, 342–346.
- 29 A. Poater, F. Ragone, S. Giudice, C. Costabile, R. Dorta, S. P. Nolan and L. Cavallo, *Organometallics*, 2008, **27**, 2679–2681.
- 30 A. Poater, B. Cosenza, A. Correa, S. Giudice, F. Ragone, V. Scarano and L. Cavallo, *Eur. J. Inorg. Chem.*, 2009, **2009**, 1759–1766.
- 31 H. Clavier and S. P. Nolan, *Chem. Commun.*, 2010, **46**, 841–861.
- 32 A. Poater, F. Ragone, R. Mariz, R. Dorta and L. Cavallo, *Chem. Eur. J.* 2010, **16**, 14348–14353.
- 33 F. Pedregosa, G. Varoquaux, A. Gramfort, V. Michel, B. Thirion, O. Grisel, M. Blondel, P. Prettenhofer, R. Weiss, V. Dubourg, J. Vanderplas, A. Passos, D. Cournapeau, M. Brucher, M. Perrot, E. Duchesnay and G. Louppe, *J. Mach. Learn. Res.* 2012, **12**.
- 34 J. Karch, *Improving on Adjusted R-Squared*, 2019.
- 35 M. Salamone, G. Carboni and M. Bietti, *J. Org. Chem.*, 2016, **81**, 9269–9278.
- 36 S. Feng, X. Xie, W. Zhang, L. Liu, Z. Zhong, D. Xu and X. She, *Org. Lett.*, 2016, **18**, 3846–3849.
- 37 A. M. Carestia, D. Ravelli and E. J. Alexanian, *Chem. Sci.*, 2018, **9**, 5360–5365.
- 38 S. Mukherjee, B. Maji, A. Tlahuext-Aca and F. Glorius, *J. Am. Chem. Soc.*, 2016, **138**, 16200–16203.
- 39 T. Lu, *Molclus program*, <http://www.keinsci.com/research/molclus.html>.
- 40 W. Humphrey, A. Dalke and K. Schulten, *J. Mol. Graphics* 1996, **14**, 33. VMD Official website. <http://www.ks.uiuc.edu/Research/vmd/>.
- 41 P. Virtanen, R. Gommers, T. E. Oliphant, M. Haberland, T. Reddy, D. Cournapeau, E. Burovski, P. Peterson, W. Weckesser, J. Bright, S. J. van der Walt, M. Brett, J. Wilson, K. J. Millman, N. Mayorov, A. R. J. Nelson, E. Jones, R. Kern, E. Larson, C. J. Carey, Í. Polat, Y. Feng, E. W. Moore, J. VanderPlas, D. Laxalde, J. Perktold, R. Cimrman, I. Henriksen, E. A. Quintero, C. R. Harris, A. M. Archibald, A. H. Ribeiro, F. Pedregosa, P. van Mulbregt, A. Vijaykumar, A. P. Bardelli, A. Rothberg, A. Hilboll, A. Kloeckner, A. Scopatz, A. Lee, A. Rokem, C. N. Woods, C. Fulton, C. Masson, C. Häggström, C. Fitzgerald, D. A. Nicholson, D. R. Hagen, D. V. Pasechnik, E. Olivetti, E. Martin, E. Wieser, F. Silva, F. Lenders, F. Wilhelm, G. Young, G. A. Price, G.-L. Ingold, G. E. Allen, G. R. Lee, H. Audren, I. Probst, J. P. Dietrich, J. Silterra, J. T. Webber, J. Slavič, J. Nothman, J. Buchner, J. Kulick, J. L. Schönberger, J. V. de Miranda Cardoso, J. Reimer, J. Harrington, J. L. C. Rodríguez, J. Nunez-Iglesias, J. Kuczynski, K. Tritz, M. Thoma, M. Newville, M. Kümmerer, M. Bolingbroke, M. Tartre, M. Pak, N. J. Smith, N. Nowaczyk, N. Shebanov, O. Pavlyk, P. A. Brodtkorb, P. Lee, R. T. McGibbon, R.

- Feldbauer, S. Lewis, S. Tygier, S. Sievert, S. Vigna, S. Peterson, S. More, T. Pudlik, T. Oshima, T. J. Pingel, T. P. Robitaille, T. Spura, T. R. Jones, T. Cera, T. Leslie, T. Zito, T. Krauss, U. Upadhyay, Y. O. Halchenko, Y. Vázquez-Baeza and C. SciPy, *Nat. Methods*, 2020, **17**, 261–272.
- 42 C. Le, Y. Liang, R. W. Evans, X. Li and D. W. C. MacMillan, *Nature*, 2017, **547**, 79–83.
- 43 X. Zhang and D. W. C. MacMillan, *J. Am. Chem. Soc.*, 2017, **139**, 11353–11356.
- 44 K. A. Margrey, W. L. Czaplyski, D. A. Nicewicz and E. J. Alexanian, *J. Am. Chem. Soc.*, 2018, **140**, 4213–4217.
- 45 J. Jin and D. W. C. MacMillan, *Angew. Chem. Int. Ed.*, 2015, **54**, 1565–1569.
- 46 J. D. Cuthbertson and D. W. C. MacMillan, *Nature*, 2015, **519**, 74–77.
- 47 M. Salamone and M. Bietti, *Acc. Chem. Res.*, 2015, **48**, 2895–2903.
- 48 K. Qvortrup, D. A. Rankic and D. W. C. MacMillan, *J. Am. Chem. Soc.*, 2014, **136**, 626–629.
- 49 J. Jin and D. W. C. MacMillan, *Nature*, 2015, **525**, 87–90.
- 50 S. Devari, M. A. Rizvi and B. A. Shah, *Tetrahedron Lett.*, 2016, **57**, 3294–3297.
- 51 S. Mukherjee, T. Patra and F. Glorius, *ACS Catal.*, 2018, **8**, 5842–5846.
- 52 S. Mukherjee, R. A. Garza-Sanchez, A. Tlahuext-Aca and F. Glorius, *Angew. Chem. Int. Ed.*, 2017, **56**, 14723–14726.
- 53 M. Bietti, R. Martella and M. Salamone, *Org. Lett.*, 2011, **13**, 6110–6113.
- 54 M. Salamone, M. Milan, G. A. DiLabio and M. Bietti, *J. Org. Chem.*, 2013, **78**, 5909–5917.
- 55 M. Bietti and M. Salamone, *Org. Lett.*, 2010, **12**, 3654–3657.
- 56 M. Salamone, I. Giammarioli and M. Bietti, *J. Org. Chem.*, 2011, **76**, 4645–4651.
- 57 M. Salamone, L. Mangiacapra and M. Bietti, *J. Org. Chem.*, 2015, **80**, 1149–1154.
- 58 M. Milan, M. Salamone and M. Bietti, *J. Org. Chem.*, 2014, **79**, 5710–5716.
- 59 M. Salamone, G. A. DiLabio and M. Bietti, *J. Org. Chem.*, 2012, **77**, 10479–10487.
- 60 M. Milan, M. Salamone, M. Costas and M. Bietti, *Acc. Chem. Res.*, 2018, **51**, 1984–1995.
- 61 M. Salamone, G. A. DiLabio and M. Bietti, *J. Am. Chem. Soc.*, 2011, **133**, 16625–16634.
- 62 M. Salamone, R. Martella and M. Bietti, *J. Org. Chem.*, 2012, **77**, 8556–8561.
- 63 M. Salamone, M. Milan, G. A. DiLabio and M. Bietti, *J. Org. Chem.*, 2014, **79**, 7179–7184.
- 64 M. Salamone, F. Basili and M. Bietti, *J. Org. Chem.*, 2015, **80**, 3643–3650.
- 65 M. Salamone, V. B. Ortega, T. Martin and M. Bietti, *J. Org. Chem.*, 2018, **83**, 5539–5545.
- 66 M. Salamone, V. B. Ortega and M. Bietti, *J. Org. Chem.*, 2015, **80**, 4710–4715.
- 67 E. Boess, L. M. Wolf, S. Malakar, M. Salamone, M. Bietti, W. Thiel and M. Klussmann, *ACS Catal.*, 2016, **6**, 3253–3261.
